# Supplementary material for: Microbial community responses determine how soil-atmosphere exchange of carbonyl sulfide, carbon monoxide and nitric oxide respond to soil moisture
Source: Copernicus journal article supplement (doi:10.5194/soil-2018-7), 2018-05-16
Supplement: Supplementary file [file soil-2018-7-AC4-supplement.pdf]

1 **Microbial community responses determine how soil-atmosphere**  
2 **exchange of carbonyl sulfide, carbon monoxide and nitric oxide**  
3 **respond to soil moisture**

4 Thomas Behrendt<sup>1,†</sup>, Elisa C. P. Catão<sup>1</sup>, Rüdiger Bunk<sup>2</sup>, Zhigang Yi<sup>2,3</sup>, Elena Schwer<sup>1</sup>, [Steffen](#)  
5 [Kolb](#)<sup>4</sup>, Jürgen Kesselmeier<sup>2</sup>, Susan Trumbore<sup>1</sup>

6  
7 <sup>1</sup>Department Biogeochemical Processes, Max Planck Institute for Biogeochemistry, Jena

8 <sup>2</sup>Department Multiphase Chemistry, Max Planck Institute for Chemistry, Mainz

9 <sup>3</sup>College of Resources and Environment, Fujian Agriculture and Forestry University, Fuzhou,  
10 China

11 [4Research Group Microbial Biogeochemistry, Research Area 1 Landscape Functioning,](#)  
12 [Leibniz-Zentrum für Agrarlandschaftsforschung \(ZALF\) e. V., Muencheberg, Germany](#)

13 †Correspondence to: tbehr@bgc-jena.mpg.de, Phone: +49-(0) 3641-57-6105, Fax: +49-(0)  
14 3641-57-70

15  
16 Keywords: carbonyl sulfide production, thiocyanate degradation, carbonyl sulfide  
17 consumption, nitric oxide, carbon monoxide, CO<sub>2</sub> fixation

18  
19 [Research Article](#)

## 26 Abstract

27 Carbonyl sulfide (OCS) plays an important role in the global sulfur cycle and is relevant for  
28 climate change due to its role as a greenhouse gas, in aerosol formation and atmospheric  
29 chemistry. The similarities of the carbon dioxide (CO<sub>2</sub>) and OCS molecules within chemical  
30 and plant metabolic pathways have led to the use of OCS as a proxy for global gross CO<sub>2</sub>  
31 fixation by plants (gross primary production, GPP). However, unknowns such as the OCS  
32 exchange from soils, where simultaneous OCS production (P<sub>OCS</sub>) and consumption (U<sub>OCS</sub>)  
33 occur, currently limits the use of OCS as a GPP proxy. We estimated P<sub>OCS</sub> and U<sub>OCS</sub> by  
34 measuring net fluxes of OCS, carbon monoxide (CO) and nitric oxide (NO) in a dynamic  
35 chamber system fumigated with air containing different OCS mixing ratios [OCS].  
36 ~~Nine~~ Several different soils with different land use were rewetted and soil-air exchange was  
37 monitored as soils dried out to ~~assess~~ investigate responses to changing moisture ~~levels~~. A  
38 major control of OCS exchange ~~was~~ the total amount of available sulfur in the soil. P<sub>OCS</sub>  
39 production rates were highest for soils at WFPS > 60% and rates were negatively related to  
40 thiosulfate concentrations. These moist soils ~~switched~~ flipped from ~~being a~~ net sources to a net  
41 sinks ~~activity of OCS~~ at moderate moisture levels (WFPS 15 to 37%). For three soils we  
42 ~~measured~~ By measuring CO and NO and CO mixing ratios while fumigating soils at different  
43 ~~mixing ratios~~ levels of OCS, and revealed that NO and potentially CO exchange rates we  
44 ~~could show that CO consumption and NO exchange~~ are linked to U<sub>OCS</sub> ~~at~~ under moderate soil  
45 moisture. High nitrate concentrations correlated ~~Based on the~~ with maximum OCS release  
46 rates at high soil moisture. ~~CO flux ratio two different U<sub>OCS</sub> processes could be separated.~~ For  
47 one of the investigated soils, moisture and OCS mixing ratio was correlated with different we  
48 ~~demonstrated changes in~~ microbial activity (bacterial 16S rRNA, fungal ITS RNA relative  
49 abundance) and gene transcripts of ~~and~~ red-like *cbbL* and *amoA* ~~genes that suggested shifts in~~  
50 ~~the U<sub>OCS</sub> processes with moisture and OCS concentration. This supports the view that~~

51 | ~~Ribulose-1,5-Bisphosphate Carboxylase (RubisCO) plays an important role for U<sub>OCs</sub> and~~  
52 | ~~demonstrates a link to the nitrogen cycle.~~

## 53 1 Introduction

54 Carbonyl sulfide (OCS) is the most abundant sulfur containing trace gas in the troposphere  
55 with a life time ~~ion~~ on the order of years. OCS contributes to warming of the troposphere and  
56 cooling ~~offin~~ the stratosphere, and both processes are considered balanced (Brühl et al., 2012).  
57 Plants simultaneously take up carbon dioxide (CO<sub>2</sub>) and OCS by ~~the enzymes contribution of~~  
58 ~~the enzymes~~ Ribulose-1,5-bisphosphate-carboxylase (RubisCO) and  
59 Phosphoenolpyruvate-carboxylase (PEPCO), ~~enhanced by~~ Carbonic anhydrase (CA)  
60 enhances this uptake process, since it accumulates CO<sub>2</sub> intracellularly; (Protoschill-Krebs and  
61 Kesselmeier, 1992; Protoschill-Krebs et al. 1996). ~~Thus, fluxes of OCS are closely related to~~  
62 gross photosynthesis, and represents the largest global OCS, ~~i.e., sink with~~ 0.73 to 1.5 Tg S  
63 a<sup>-1</sup> (Sandoval-Soto et al., 2005). Thus, fluxes of OCS are closely related to gross CO<sub>2</sub> uptake  
64 during photosynthesis. Soils can act as both sources and sinks of OCS. While anoxic soils and  
65 wetlands are considered a global source for OCS of about 0.05 Tg a<sup>-1</sup> (Watts, 2000),  
66 oxic upland soils are accounted as a sink for OCS of about 0.3 ~~655~~ Tg a<sup>-1</sup> (Berry et al., 2013).  
67 OCS uptake in soils ~~has been considered though~~ to be predominantly performed ~~dominated~~ by  
68 CA (Wingate et al., 2009). However, ~~but~~ there is some evidence that RubisCO of soil  
69 microorganisms might also play a role (Whelan et al., 2017; Kesselmeier et al., 1999,  
70 Meredith et al., 2018<sup>b</sup>). The microbial mechanisms underlying OCS production (P<sub>OCS</sub>) and  
71 consumption (U<sub>OCS</sub>) in soil, however, are not resolved and a topic to recent research ~~yet known~~  
72 (Ogée et al., 2016). In fact, current studies report that soils can switch flip between net OCS  
73 uptake and emission related either to soil moisture and/or soil temperature (Bunk et al., 2017;  
74 Whelan et al., 2016; Maseyk et al., 2014). Thus, an better understanding of environmental  
75 factors controlling ~~interacting with~~ the soil microbial community is required for the prediction  
76 of net soil OCS fluxes from the ecosystem to global scale.

77 | ~~The majority of OCS can be produced~~ released by microbial decomposition of organic S  
78 | compounds via thiosulfate (with minor amounts of CS<sub>2</sub>; Smith and Kelly, 1988), and  
79 | thiocyanate hydrolysis (Katayama et al., 1992). Nonetheless, alternative metabolic pathways  
80 | for OCS production might occur in soil (Conrad, 1996). A recent study suggest thiocyanate as  
81 | important precursor in microbial OCS production. However, there is no clear evidence if it is  
82 | the only or main precursor in soil since it can also inhibit microbial OCS production  
83 | (Katayama, et al., 1992). ~~There is indication that also archaea are capable of OCS production~~  
84 | ~~via CS<sub>2</sub> hydrolase (Smeulders et al., 2011). OCS production from thiocyanate likely~~  
85 | ~~dominates in vegetated soils, due to thiocyanate which is released during decomposition of~~  
86 | ~~plant litter (Bunk et al., 2017; Kelly et al., 1993). Organisms that are known S oxidizers~~  
87 | bacteria that ~~to~~ utilize this pathway are *Thiobacillus thioparus*, *Thiohalophilus*  
88 | *thiocyanatoxydans*, *Acinetobacter junii*, *Geodermatophilus obscurus*, *Amycolatopsis*  
89 | *orientalis*, belonging to sulfur oxidizing bacteria (Katayama et al., 1992; Sorokin et al., 2006;  
90 | Mason et al., 1994; Ogawa et al., 2016). Sulfate (Banwart and Bremner, 1976), S-containing  
91 | amino acids (Banwart and Bremner, 1975), and other S compounds (Flöck et al., 1997;  
92 | Lehmann and Conrad, 1996) can therefore act as precursors for microbial OCS formation.  
93 | Additionally, an abiotic process, in which organic matter is degraded dependent on  
94 | temperature and/or light might be of importance for P<sub>OCS</sub> (Whelan et al., 2015).

95 | Consumption of OCS can be linked to microbial pathways in soils that utilize associated with  
96 | utilization of either CO<sub>2</sub> or bicarbonate (HCO<sub>3</sub><sup>-</sup>) ~~substrates~~ by various microbial carboxylases.  
97 | ~~These enzymes can be differentiated and are similar to those found in plants~~ (Erb, 2011).  
98 | ~~CA~~ Carbonic anhydrase reversibly catalyzes the hydration of gaseous CO<sub>2</sub>, to bicarbonate  
99 | (HCO<sub>3</sub><sup>-</sup>) under neutral pH (Smith and Ferry, 2000). As an ubiquitous enzyme for exchanging  
100 | and equilibrating CO<sub>2</sub>, ~~CA does it is~~ not only occur present in ~~soils and~~ higher plants but also in  
101 | algae and lichens, which may assimilate S ~~the latter discussed to gain sulfur~~ from the  
102 | atmosphere ~~this way~~ (Kuhn and Kesselmeier, 2000). ~~Within this context, CA has also been~~

103 ~~shown to~~ irreversibly catalyzes OCS to H<sub>2</sub>S and CO<sub>2</sub> ~~in pure microbial cultures~~ (Ogawa et al.,  
104 2016; Protoschill-Krebs et al., 1995; Blezinger et al., 2000; Notni et al 2007). A recent study  
105 found a correlation of OCS exchange rates and CO<sup>18</sup>O with different forms of CA (Meredith  
106 et al., 2018<sup>b</sup>).

107

108 RubisCO occurs in plants and other photoautotrophs, is present in all phototrophic tissues and  
109 occurs in soil microbial chemolithoautotrophs cells and some autotrophic microorganisms in  
110 soils (Badger and Bek, 2008). T, and thus, RubisCO is also a candidate for OCS consumption.  
111 In plant leaves, stomatal control is the main regulator of OCS uptake, ~~although elevated CO<sub>2</sub>~~  
112 ~~may affect CA levels over the long term~~ (Sandoval-Soto et al. 2012). In soils,  
113 ~~accumulating elevated CO<sub>2</sub> mixing ratios may levels have been discussed to have~~ the potential  
114 for ~~competitive~~ inhibition of RubisCO but not for the alternative enzymes by which soil  
115 organisms may uptake CO<sub>2</sub>, such as CA or PEPCO (Bunk et al., 2017; ). ~~PEPCO similarly~~  
116 ~~can fix HCO<sub>3</sub><sup>-</sup> (Cousins et al., 2007) and is present in both plants and soil microorganisms.~~

117 In addition to its co-metabolism due to its similarity with CO<sub>2</sub>, OCS can be a direct source of  
118 sulfur and/or energy for some autotrophs and heterotrophs. Based on pure culture studies,  
119 *Thiobacillus thioparus* (Smith and Kelly, 1988; Kamezaki et al., 2016), fungal and bacterial  
120 strains belonging to *Trichoderma* (Masaki et al., 2016), and *Actinomycetales* (Ogawa et al.,  
121 2016), ~~respectively, may could~~ degrade OCS. Initial has been shown by Laing and Christeller  
122 (1980) that OCS acts as a competitive inhibitor for CO<sub>2</sub> uptake by RubisCO, where CO<sub>2</sub> and  
123 OCS compete for the active center of the enzyme as alternative substrates (Lorimer and  
124 Pierce, 1989) measurements of sulfur isotopic fractionation factors (ε<sup>34</sup>) (Kamezaki et al.,  
125 2016) indicate the potential to estimate the OCS sink in soils using δ<sup>34</sup>S measurements.

126

127 Additional clues to processes controlling uptake of The OCS production process which has  
128 been found to correlate with the amount of nitrogen fertilizer (Kaisermann et al., 2018;

129 Melillo and Steudler, 1989) is still not understood and thus, it is still unknown if OCS  
130 consumption might be linked to the nitrogen cycle as well. In aerobic soils NO is  
131 predominantly produced by nitrifiers (e.g. Placella and Firestone, 2013). In addition, some  
132 methanotroph species fix carbon via RubisCO (Rasigraf et al., 2014, and references therein).  
133 Instead of RubisCO, ammonia oxidizing archaea utilize the  
134 hydroxypropionate/hydroxybutyrate cycle for aerobic CO<sub>2</sub> fixation (Könneke et al., 2014;  
135 Pratscher et al., 2011). Thus, there is evidence that microbial NO (and potentially CO)  
136 exchange might be linked to each other~~come from observing relationships with other gases~~  
137 ~~consumed by soils, such as CO. Ammonia-oxidizing bacteria~~~~There is evidence that the sinks~~  
138 ~~for CO and OCS are related to each other: (1) Nitrifiers and methanotrophs~~ may are capable of  
139 ~~aerobic CO~~ co-oxidization CO via ammonia monooxygenase (AMO) and methane  
140 monooxygenase (MMO) that likely is stoichiometrically correlated to ammonia oxidation  
141 ~~(MMO, Bédard & Knowles, 1989; Jones & Morita, 1983; Jones et al., 1984; Bender and~~  
142 ~~Conrad, 1994), whereas archaeal CO oxidizers are unknown (King and Weber, 2007).~~

143

144 There is some evidence that the CO and OCS consumption is coupled since various  
145 carboxydrotrophic soil microorganisms exist. Soil ammonia oxidizers and methanotrophs are  
146 capable of CO co-oxidation via ammonia and methane monooxygenase (Bédard & Knowles,  
147 1989; Jones & Morita, 1983; Jones et al., 1984; Bender and Conrad, 1994). Aerobic  
148 carboxydrotrophic bacteria and fungi can consume CO (King and Weber, 2007; Inman and  
149 Ingersoll, 1971). Inhibition experiments indicate that fungi might utilize CA for OCS  
150 consumption (Bunk et al., 2017). Archaeal carboxydrotrophs are typically hyperthermophilic  
151 aerobes that are not common in temperate soils (King and Weber, 2007; Sokolovka et al.,  
152 2017). The energy ~~conserved~~gained from the oxidation of CO can be utilized for CO<sub>2</sub> fixation  
153 within the Calvin-Benson-Bassham (CBB) cycle via RubisCO (Ragsdale, 2004). (2)

154 Anaerobes, such as acetogens, methanogens, and sulfate reducers that harbor ~~are able to~~

155 ~~catalyze the oxidation of CO via carbon monoxide dehydrogenase (CODH) anaerobically~~  
156 ~~within the Wood-Ljungdahl pathway might also be capable to oxidize CO via carbon~~  
157 ~~monoxide dehydrogenase, CODH of CO<sub>2</sub> fixation (Davidova et al., 1993; Ragsdale 2004;~~  
158 ~~Alber 2009), that will also fix OCS. Also aerobic CO oxidizing bacteria are known which can~~  
159 ~~consume CO (King and Weber, 2007). (3) Some fungi are able to consume CO (Inman and~~  
160 ~~Ingersoll, 1971) and inhibition experiments indicate their role utilizing CA for OCS~~  
161 ~~consumption (Bunk et al., 2017). CO dehydrogenase can reduce OCS to CO and H<sub>2</sub>S and the~~  
162 ~~substrate affinity for the substrate OCS, expressed as K<sub>M</sub>, is about 2.2 mM for OCS (Conrad,~~  
163 ~~1996), while for nitrogenase it is about 3.1 mM (Conrad, 1996). While some enzymes~~  
164 ~~consume only OCS (e.g. CA), others consume OCS and produce CO (e.g. CODH).~~  
165 ~~Consistently, Thus, it is assumed that the activity of different enzymes is expressed in the~~  
166 ~~OCS:CO ratios are correlated with CO:CO<sub>2</sub> ratios. Sun and co-workers (2017) showed that~~  
167 ~~OCS:CO<sub>2</sub> ratios are related to CO:CO<sub>2</sub> ratios in a boreal forest (Sun et al., 2017). Abiotic CO  
168 ~~production from abiotic, which is dependent on the temperature of photodecomposition of  
169 ~~organic matter (Conrad & Seiler, 1985), might be negligible occurs also in soils, but under~~  
170 ~~dark incubation are expected to be small.~~~~~~

171

172 ~~A key goal of our study was to explore whether simultaneous measurements of e.g. NO and~~  
173 ~~CO and microbial activity by RNA-based approaches have the potential to indicate active~~  
174 ~~metabolic pathways (e.g. CO<sub>2</sub> fixation via different enzymes). In turn, this information may~~  
175 ~~provide insights into pathways of POCS and UOCS in a way that allows prediction of net~~  
176 ~~OCS fluxes across a range of soils and moisture contents. Ultimately the ability to understand~~  
177 ~~the role of soils in net ecosystem exchange of OCS is relevant to enable the estimation of~~  
178 ~~canopy fluxes of OCS and their interpretation as a proxy for gross primary production, GPP~~  
179 ~~(Campbell et al., 2017; Campbell et al., 2008; Blonquist et al., 2011; Berry et al., 2013).We~~  
180 ~~expect that uptake of OCS via RubisCO will result in different OCS:CO fluxes compared to~~



181 ~~the other enzymes discussed above. It has been shown by Laing and Christeller (1980) that~~  
182 ~~OCS acts as a competitive inhibitor for CO<sub>2</sub> uptake by RubisCO, where CO<sub>2</sub> and OCS~~  
183 ~~compete for the active center of the enzyme as alternative substrates (Lorimer and Pierce,~~  
184 ~~1989). A second process that can inhibit CO<sub>2</sub> uptake by RubisCO is described by Lorimer and~~  
185 ~~Pierce (1989): if in the activation step RubisCO is thiocarbamylated by a molecule of OCS~~  
186 ~~instead of being carbamylated by a molecule of CO<sub>2</sub> (which is distinct from the CO<sub>2</sub> molecule~~  
187 ~~taken up in the carboxylation step, see Lorimer and Pierce 1989), the enzyme becomes~~  
188 ~~catalytically incapable of taking up CO<sub>2</sub> or OCS in the carboxylation/thiocarboxylation step.~~  
189 ~~According to differences in substrate affinity and reaction velocity a lower OCS than CO<sub>2</sub>~~  
190 ~~concentration should be sufficient to result in competitive inhibition in CA reactions. For~~  
191 ~~RubisCO the k<sub>M</sub> ratio for OCS:CO<sub>2</sub> is only about 1 x 10<sup>-2</sup> (Lorimer and Pierce, 1989) and~~  
192 ~~therefore competitive inhibition at normal atmospheric levels for these gases seems unlikely.~~  
193 ~~Thus, it is thought that the reversible process of thiocarbamylation can result in RubisCO~~  
194 ~~remaining catalytically inactive for a certain time. By this mechanism elevated concentrations~~  
195 ~~of OCS in soil pore space might be already sufficient to cause a perceivable inhibition of~~  
196 ~~RubisCO. It can be hypothesized that the substrate affinity of RubisCO for CO<sub>2</sub> and OCS~~  
197 ~~differs (see Lorimer and Pierce 1989).~~

198  
199 Based on this approach, we investigated whether NO and CO exchange rates measured over a  
200 range of different moisture conditions and in different soils reveal the influence of soil  
201 moisture on the underlying microbial metabolisms of the net soil OCS exchange. For one of  
202 the investigated soils (an agricultural soil from Germany), gas exchange rates were linked to  
203 microbial activity of archaeal and bacterial ammonia oxidisers (AOA, AOB), and fungal  
204 activity based on RNA relative abundance of internal transcribed spacer (ITS).ITS RNA's  
205 half time is low since it is functionally not needed to the establishment of ribosomes, but can  
206 be considered as a general proxy for fungal protein biosynthesis (Žifčáková et al., 2016;

207 Baldrian et al., 2012). Additionally, quantitative real time polymerase chain reaction (qPCR)  
208 was applied for detection of the functional red-like *cbbL* gene encoding RubisCO (in  
209 nongreen algae and  $\alpha$  and  $\beta$ -Proteobacteria, Selesi et al., 2005) and archaeal and bacterial  
210 *amoA* gene encoding ammonia monooxygenase. This study is based on the assumption that  
211 an increase in the numbers of rRNA and ITS RNA relative abundance reflects increased  
212 metabolic activity (Blazewicz et al., 2013; Rocca et al., 2015). Nonetheless, rRNA content is  
213 not always directly related to activity since it is relatively stable. ~~urther clues as to underlying~~  
214 ~~processes can be gained through investigation of other gases. For example, there is evidence~~  
215 ~~that the sinks for CO and the source for nitric oxide (NO) are related to each other: (1)~~  
216 ~~ammonia oxidizing bacteria and methanotrophs can co oxidize CO via AMO/MMO in soils~~  
217 ~~that should stoichiometrically link CO consumption to ammonia oxidation (Jones et al.,~~  
218 ~~1984). (2) In aerobic soils NO is predominantly produced by nitrifiers (e.g. Placella and~~  
219 ~~Firestone, 2013). In addition, some proteobacterial methanotrophs are known to fix carbon via~~  
220 ~~the CBB cycle (Rasigraf et al., 2014, and references therein). (3) Instead of RubisCO,~~  
221 ~~ammonia oxidizing archaea utilize the hydroxypropionate/hydroxybutyrate cycle for aerobic~~  
222 ~~CO<sub>2</sub> fixation (Könneke et al., 2014; Pratscher et al., 2011). Hence, OCS exchange rates~~  
223 ~~should be linked to the CBB cycle of ammonia oxidizing bacteria (AOB) and methanotrophic~~  
224 ~~bacteria (MTB). The simultaneous measurement of CO and NO exchange rates might~~  
225 ~~therefore provide clues as to which microbial groups dominate the overall gaseous exchange~~  
226 ~~in different soils.~~

227  
228 ~~A key goal of this work is to explore whether simultaneous measurements of e.g. CO and NO~~  
229 ~~and microbial activity can indicate the operation of pathways (e.g. CO<sub>2</sub> fixation via different~~  
230 ~~enzymes), that in turn can provide insight into pathways of P<sub>OCS</sub> and U<sub>OCS</sub> in a way that~~  
231 ~~allows prediction of net OCS fluxes across a range of soils and moisture contents. Ultimately~~  
232 ~~the ability to understand the role of soils in net ecosystem exchange of OCS is relevant to~~

233 ~~enable the estimation of canopy fluxes of OCS and their interpretation as a proxy for gross~~  
234 ~~primary production, GPP (Campbell et al., 2017; Campbell et al., 2008; Blonquist et al., 2011;~~  
235 ~~Berry et al., 2013).~~

236 ~~In this study, we investigated whether CO and NO exchange rates measured over a range of~~  
237 ~~different moisture conditions and in different soils suggest how moisture influences~~  
238 ~~underlying microbial metabolisms and the net soil OCS exchange. For one of the investigated~~  
239 ~~soils (an agricultural soil from Germany), gas exchange rates were linked to microbial activity~~  
240 ~~of archaeal and bacterial ammonia oxidizers (AOA, AOB), methanotrophic bacteria (MTB)~~  
241 ~~and fungal activity based on relative abundance of internal transcribed spacer (ITS)~~  
242 ~~sequences. Additionally, quantitative real time polymerase chain reaction (qPCR) was applied~~  
243 ~~for detection of the functional red like *cbbL* gene encoding RubisCO and archaeal and~~  
244 ~~bacterial *amoA* gene encoding ammonia monooxygenase. We present a conceptual~~  
245 ~~understanding of OCS exchange from soil that links OCS production and OCS consumption~~  
246 ~~processes to different CO<sub>2</sub> fixation pathways. Thus, our results are useful to predict under~~  
247 ~~what conditions soil fluxes will be an important component of ecosystem OCS fluxes, which~~  
248 ~~processes are predominant, and therefore impacting estimates of GPP based on net OCS flux.~~

## 249 **2 Materials and Methods**

### 251 **2.1 Soil analysis**

252 In total 119 samples of topsoil (integrating a depth between 0-5 cm) were used, representing  
253 different soil types and land uses (see Table 1). To make a representative sample for each site,  
254 9 individual subsamples were taken on a grid from within a 10 x 10 m area and homogenized.  
255 Samples were sieved to < 2 mm, hand-picked to remove roots, and stored at 4°C (for up to 6  
256 months) prior to incubations. The field moist soil used for the incubations was analyzed for  
257 total sulfur (S) and thiocyanate (SCN<sup>-</sup>) to link OCS production to substrate availability at the

258 start of the incubation experiments. Bulk soil sulfur content was determined on an elemental  
259 analyser (Vario EL, Elementar Analysensysteme GmbH, Germany). For thiocyanate  
260 measurement about 8 g of soil was extracted in 1 M sodium hydroxide (NaOH) solution,  
261 centrifuged and filtered to remove particulates. Thiocyanate concentrations (reported per gram  
262 dry soil) were determined colorimetrically using 50 mm cuvettes and adding chloramine-T-  
263 isonicotin acid as well as 1,3 dimethylbarbituric acid (Environment Agency, 2011).  
264 Absorption measurements were made at 600 nm using a photometer (DR3900, Hach Lange  
265 GmbH, Germany), calibrated based on a standard curve of diluted potassium thiocyanate from  
266 1-5 mg L<sup>-1</sup>. The blank for photometry analysis was subjected to the same color reactions as  
267 the samples using 1 M NaOH instead of sample extract. For ammonium (NH<sub>4</sub><sup>+</sup>) and nitrate  
268 (NO<sub>3</sub><sup>-</sup>) quantification 5 g soil have been extracted in 50 ml of 2 M KCl for 60 minutes and  
269 were filtered through a 604 ½ Whatman<sup>TM</sup> filter paper (GE Healthcare, Chicago, Illinois,  
270 USA). The filtered extracts were frozen at -20 °C until analysis with a flow injection analyzer  
271 (Quickchem QC85S5, Lachat Instruments, Hach Company, Loveland CO, USA).

272

## 273 2.2 Incubations

274 An automated dynamic chamber system was used to incubate soil at 25 °C in the dark  
275 (Behrendt et al., 2014). The system has 6 chambers, switching so that it is measuring one  
276 while flushing the other five. It also includes a soil-free reference chamber. Experiments of  
277 pseudo-replicates, which were representative for a 10 x 10 m area were run in series, with 3  
278 technical replicates at any given time, for a given soil moisture. Each chamber was measured  
279 for 15 minutes and then flushed at a rate of 2.5 L min<sup>-1</sup>.

280 At the start of each experiment ~~run~~ (for overview see Table 1), soil (~ 60 g) was moistened  
281 to saturation field capacity (100-% water-filled pore space, WFPS) for most soils; 80-% WFPS  
282 for desert soils (D1 and D2 ~~samples~~) and placed into Plexiglas incubation chambers (inner

283 diameter 0.092 m, height 0.136 m). The composition of air entering the chambers (flow 500  
284 mL min<sup>-1</sup>) was adjusted by adding ~~ambient levels of CO<sub>2</sub> (Westfalen, Germany ~ 400 ppm) to~~  
285 a CO<sub>2</sub> free air stream using soda lime to reach ~ 400 ppm ± 8 ppm and a variable amount of  
286 OCS to “zero” air produced by a pure air generator (PAG 003, Eco Physics AG, Switzerland);  
287 ~~CO<sub>2</sub> ambient~~. For practical reasons, different experiments were performed to test various  
288 controls on OCS fluxes. First, OCS fluxes were compared using soils from agricultural  
289 sitesamples – corn (A1 and A2), sugar beet (A3), and wheat (A4) as well as from a grassland  
290 site (A5), from sand deserts (D1 and D2), and from a natural and previously burned rainforest  
291 (F1 and F2) under ambient OCS mixing ratios (about 500 ppt). A1 to A5, both 50 ppt and  
292 1000 ppt of OCS were used. For samples D1, D2, F1, and F2 only one level of OCS (500 ppt)  
293 was used. Second, for 3 soils NO and CO exchange rates were compared under 50 and 1000  
294 ppt OCS fumigation using the fresh and 40°C dried mid-latitude cornfield soil (A1) Mainz,  
295 Germany and a soil sample originated from a spruce forest (F3) Sparneck, Germany. Data for  
296 OCS exchange for A1 are shown in the supplementary information. Third for only one site, a  
297 fresh mid-latitude cornfield soil (A1) also previously investigated for OCS exchange  
298 (Kesselmeier et al., 1999; Van Diest & Kesselmeier, 2008; Bunk et al., 2017) we stopped  
299 the incubation at selected moisture and subsampled for molecular analysis. During the  
300 incubations, sub-samples of this soil were taken at 4 different soil moistures flushed with  
301 OCS-free air (50 ppt). In addition, one sample at the moisture representing maximum OCS  
302 consumption under 1000 ppt OCS fumigation was taken for microbial analysis.~~The fluxes of~~  
303 ~~gases (OCS, NO and CO) were calculated from the concentration difference between air~~  
304 ~~exiting and entering the chamber and the mass flow rate. In all experiments reported here the~~  
305 ~~inlet air contained no CO or NO, and the soil was treated with different OCS inlet mixing~~  
306 ~~ratios of either 50, 500 or 1000 ppt, depending on the experiment (see Tab. 1).~~

307

308 For OCS, comparison of net fluxes measured using different levels of OCS in inlet air allows  
309 separate quantification of OCS production and consumption contributions to the net flux  
310 (KaisermannBehrendt et al., 20184). As the air entering the chamber is moisture-free, the soils  
311 dry out over time, allowing us to see how gas production and consumption changed with soil  
312 moisture. At the start and end of each experiment the gravimetric soil moisture ( $\theta_g$ ) was  
313 determined. Over the course of the experiment gravimetric soil moisture was determined by  
314 calculating the mass balance of evaporated water vapor (Behrendt et al., 2014).  
315 For the comparison of results of soils that differ in texture, the gravimetric soil moisture was  
316 converted into percent of water filled pore space,  $WFPS_{lab}$  as

$$WFPS_{lab}(t_i) = \frac{m_{soil}(t_i) - m_{soil}(t_s)}{m_{soil}(t_s)} \cdot \frac{100}{\theta_{sat}} \quad (1)$$

317 where  $\theta_{sat}$  is the gravimetric soil moisture at saturationfield capacity, which was estimated by  
318 re-wetting the soil until the surface of particles were covered by a tiny film of water (see  
319 Bourtsoukidis et al., submitted).  $M_{soil}(t_i)$  equals the dry mass of soil plus water at any given  
320 time point  $t_i$  and  $m_{soil}(t_s)$  equals the dry mass of soil plus the residual mass of water at the end  
321 of the experiment.

~~322 As the inlet air always had ambient  $O_2$  concentrations, the potential for anoxia in the wettest  
323 soils may have been reduced compared to what might be experienced in a field setting in soil.  
324 However, as the soils sat for a period before air flow was initiated, the first results may reflect  
325 anoxic conditions in the soils. Different experiments were performed to test various controls  
326 on OCS fluxes. First, OCS and CO fluxes were compared using soils from agricultural sites—  
327 corn (A1 and A2), sugar beet (A3), and wheat (A4), as well as from a grassland site (A5),  
328 from sand deserts (D1, D2), and from a natural and previously burned rainforest (F1, F2)  
329 under ambient OCS mixing ratios (about 500 ppt).~~

330 ~~Second, soil CO and NO exchange rates were compared under 50 and 1000 ppt OCS~~  
331 ~~fumigation using the 40 °C dried mid latitude cornfield soil (A1), Mainz, Germany. Data for~~  
332 ~~OCS exchange for A1 are used from a separate study (Bunk et al., submitted). We~~  
333 ~~additionally present here CO and NO exchange rates for these incubations of A1 soil and~~  
334 ~~focus in their patterns in correlation to OCS exchange under 50 ppt and 1000 ppt OCS~~  
335 ~~fumigation (for overview of experiments, see Tab. 1).~~

336 ~~Third, for only one site (A1), a mid latitude cornfield soil also previously investigated for~~  
337 ~~OCS exchange (Kesselmeier et al., 1999; Van Diest & Kesselmeier 2008; Bunk et al., 2017;~~  
338 ~~Bunk et al., submitted) we stopped the incubation at selected moisture contents and inlet OCS~~  
339 ~~concentrations and performed intensive molecular analysis to see how the gas fluxes~~  
340 ~~represented active microbial genes. During the incubations, sub-samples of this soil were~~  
341 ~~taken at 4 different soil moistures fumigated with 50 ppt OCS. In addition, one sample at the~~  
342 ~~moisture representing maximum OCS consumption under 1000 ppt OCS fumigation was~~  
343 ~~taken for microbial analysis.~~

344

### 345 **2.3 OCS, ~~CO~~, NO and CO exchange rates**

346 The selected outflow from the six soil chambers of the automated incubation system was  
347 connected to a commercial OCS/CO<sub>2</sub>/CO/H<sub>2</sub>O analyzer (907-0028, Los Gatos Research Inc.,  
348 USA). Absorption peaks were detected at gas-specific spectral lines (OCS at 2050.40 cm<sup>-1</sup>  
349 and CO at 2050.86 cm<sup>-1</sup>). The instrument performs an off-axis integrated cavity output  
350 spectroscopy (OA-ICOS), a type of cavity enhanced absorption spectroscopy. In principle the  
351 absorption of a quantum cascade laser light by a trace gases is measured according the  
352 Bouguer Lambert Beer's law. For incubations of the agricultural soil (A1 fresh and 40 °C  
353 dried) and a soil sample from a spruce forest (F3)A4 soils, a NO<sub>x</sub> analyzer was also connected  
354 to the collection line (42i-TL, Thermo Scientific, USA), and NO was detected via

355 chemiluminescence. NO standard gas (5 ppm, Air Liquide, Germany) was used for the  
356 calibration of the NO<sub>x</sub> analyzer ~~and the accuracy and precision of the OCS analyzer was~~  
357 ~~validated across another OCS instrument (Bunk et al., 2017).~~ The limit of detection was  
358 estimated based on the 3σ of the noise from the soil free chamber (LOD<sub>NO</sub> = 0,15 ppb NO,  
359 LOD<sub>OCS</sub> < 15 ppt and LOD<sub>CO</sub> < 0.3 ppb). The precision and accuracy of laser spectrometers  
360 has been evaluated in detail elsewhere (Kooijmans et al., 2016).

361 In front of the inlet of both analyzers a nafion dryer (perma pure MD-110, Perma Pure LLC,  
362 USA) was installed. The exchange rate of each trace gas, J<sub>TG</sub>, OCS, NCO, and CNO was  
363 calculated as

$$J_{TG}(c_{ref}, T_{const}, WFPS) = \frac{Q \cdot (c_{out} - c_{ref})}{M_{soil}} \quad (2)$$

364 where Q is the flow rate through the chamber (2.5 L min<sup>-1</sup>), c<sub>out</sub> and c<sub>ref</sub> are the concentrations  
365 of each trace gas at the outlet of the soil chamber and soil free chamber (ng m<sup>-3</sup>), respectively  
366 (Behrendt et al., 2014). M<sub>soil</sub> equals the dry mass of soil after dried for 48h at 105 °C. The  
367 average and standard deviation of the fluxes were calculated for the last 5 points of each 15  
368 minute interval the air exiting the soil was analyzed, over the entire time period during which  
369 the soil dried out. While the OCS mixing ratios measured were all above the limit of  
370 detection, the difference between OCS mixing ratio of incoming and outgoing air, especially  
371 under moderate to low soil moisture, was generally only a few parts per trillion. Therefore, it  
372 seems reasonable to set a threshold of detection (i.e. the minimum detectable rate of  
373 production or consumption based on the noise of the instrument). Similar to the definition of a  
374 limit of detection, we used 3 times the deviation of OCS mixing ratios measured from one soil  
375 chamber to define this threshold and converted it into a OCS exchange rate of about ± 1.09  
376 pmol g<sup>-1</sup> h<sup>-1</sup>.

377



## 378 2.4 Extraction of RNA and amplicon sequencing

379 ~~For more detailed process understanding, microbial measurements, NO, CO and OCS fluxes~~  
380 ~~were measured under two levels of OCS in inlet air only for a single soil, the mid-latitude~~  
381 ~~cornfield from Mainz, Germany (A1). Soils were sampled at 95 %, 33 %, 21 % and 7 %~~  
382 ~~WFPS<sub>lab</sub> with 50 ppt of OCS (to minimize OCS consumption compared to OCS production)~~  
383 ~~in inlet air for amplicon sequencing and qPCR analysis to analyze which microbial groups~~  
384 ~~might be involved in the OCS production, P<sub>OCS</sub>. Under 1000 ppt OCS only one sub-sample~~  
385 ~~for sequencing at 21 % WFPS was taken, since it is quite well known that maximal OCS~~  
386 ~~consumption in agricultural soils mostly occurs under moderate soil moisture conditions.~~ A  
387 commercial RNA extraction kit (RNA Power Soil, MOBIO, USA), involving bead beating at  
388 6 m s<sup>-1</sup> for 30 s for cell disruption (FastPrep, MOBIO, USA), was used for RNA extraction of  
389 about 1 g soil. RNA has been eluted in 100 µl nuclease-free water and further cleaned with a  
390 commercial kit for RNA (RNeasy Power Clean Pro Clean-Up Kit, MOBIO, USA). Quality  
391 and quantity of purified nucleic acids were analyzed by agarose gel electrophoresis (1-% w/v),  
392 nanodrop (ND-2000, Thermo Fisher Scientific, USA) and Qubit (Thermo Fisher Scientific,  
393 USA). RNA integrity and quantity were analyzed by agarose gel electrophoresis (0.5-% w/v)  
394 and Qubit analysis, after DNase treatment (DNase Max Kit, MOBIO, USA). Subsequently,  
395 cDNA was produced with random hexamer primers (Roche) and SuperScript III Reverse  
396 Transcriptase (Invitrogen, Karlsruhe, Germany). Ribosomal 16S rRNA and ITS genes were  
397 amplified for the V3-V4 region (Klindworth et al, 2013) and ITS3F-4R region (White et al.,  
398 1990), respectively, from cDNA. Amplification and sequencing library preparation were  
399 performed for MiSeq Illumina platform in Macrogen Inc. (Seoul, South Korea).

400

## 401 2.5 qPCR archaeal and bacterial *amoA* gene and for red-like *cbbL* gene

402 The abundance of archaeal and bacterial *amoA* functional marker gene encoding ammonia  
403 monooxygenase (AMO) was measured by real-time polymerase chain reaction (qPCR), with  
404 the crenamo23f/crenamo616r (Tourna et al., 2008) and amoA1F/amoA2R primers  
405 (Rotthauwe et al, 1997), respectively. The red-like *cbbL* functional marker gene encoding  
406 RubisCO large subunit type IA was quantified with cbbLR1F and cbbLR1intR primers (Selesi  
407 et al., 2007). The total reaction volume of 20  $\mu$ l consisted of 2  $\mu$ l DNA (1 ng  $\mu$ l<sup>-1</sup>) or cDNA  
408 (diluted 1/50), 0.4 or 0.6  $\mu$ M of primer (archaeal and bacterial *amoA*, respectively), 1 x Power  
409 SYBR Green PCR MasterMix (Invitrogen, Karlsruhe, Germany), performed in a qPCR cyclor  
410 (StepOnePlus<sup>TM</sup>, Applied Biosystems, USA). Reactions were performed in triplicate, and  
411 cycling parameters were set to 10 min at 95 °C for initialization, and 40 cycles of denaturation  
412 at 95 °C for 30 s, annealing for 30 s at 54 °C (archaeal *amoA*) or 60 s at 55 °C (bacterial  
413 *amoA*) or 30 s at 55 °C (*cbbL*), and 30 s at 72 °C for elongation, followed by fluorescence  
414 measurement. Melting curves were measured in the range of 60 to 95 °C in 0.3 °C increments.  
415 Standard curves were created from 10-fold dilutions of purified plasmids containing the  
416 respective gene of interest as described previously (Catão et al., 2016). Archaea and bacterial  
417 *amoA* standard curves had 87.5-% and 67.1-% efficiency, ~~respectively~~ and 0.93 and 0.97  
418 coefficient of determination ( $R^2$ ), respectively. The abundance of red-like form of Rubisco  
419 was calculated from 10-fold dilutions standard curve produced from purified DNA of  
420 *Sinorhizobium meliloti* obtained from DSMZ (number 30135), with 84.8-% efficiency and  
421 0.99 coefficient of determination ( $R^2$ ).

422

## 423 **2.6 Sequence analysis**

424 The RNA relative abundance was used as proxy for microbial activity in this study. Before  
425 sequence analysis was performed with a standard QIIME pipeline, paired-end reads of 300 bp  
426 were merged with PEAR (Zhang et al, 2014), with maximum lengths of 500 or 550 bp for 16S

427 rRNA and ITS, respectively and cleaned with PrinSeq (Schmieder & Edwards, 2011).  
428 Specific criteria were used to proceed the analysis only with high-quality reads in terms of  
429 sequence confidence: mean phred over 25 (probability that the base assigned by the sequencer  
430 is at least 99%), trim quality window of 50 (space of nucleotides scanned for quality at each  
431 time); minimum length of 200 bp; removal of artificial duplicates obtained during sequencing  
432 and only 1% of bases, which were not recognized as ATGC, were allowed (Schmieder &  
433 Edwards, 2011). Pre-cleaned sequences were analyzed with QIIME Version 1.9.1 (Caporaso  
434 et al., 2010), following *usearch61* chimera (sequences that can be artificially created during  
435 amplification of DNA molecules for the sequencing) screening, and operational taxonomic  
436 units (OTUs) picking process was performed by the *uclust\_ref* method. Chimera checking,  
437 OTU picking and OTUs taxonomy assignment of representative OTUs was based on  
438 Greengenes taxonomy database 13.8 version for 16S rRNA (McDonald et al, 2012) and ITS  
439 UNITE 12.11 version for ITS (Abarenkov et al. 2010). Biome table was exported to *.tsv* and  
440 used for calculations in R (version 3.3.1) or Igor Pro 7. For graphical representation, overall  
441 description of taxa is presented as the normalized relative abundance of the counts (from  
442 Qiime pipeline) of sequences assigned to that taxa divided by the total amount of sequences  
443 obtained after cleaning steps for each sample. Similarly, only the first hit of classification  
444 (from blast approach), with highest bit score and lowest e-value was considered. The count of  
445 reads classified per species above was normalized per the total of cleaned reads and expressed  
446 per million reads.

447

### 448 **3 Results**

449 **3.1 OCS exchange for ~~various soils~~ rewetted and dried-out soils under ambient (500 ppt)**

450 **OCS**

451 After wetting stored soils to 80-100% WFPS (~~field capacity~~), all agricultural soils (A1 to  
452 A5)~~except the sugar beet soil (A3)~~ produced OCS, with rates of production declining as the  
453 soil dried out. At  $\sim 37\%$  WFPS<sub>lab</sub>, these soils ~~switched~~flipped to a state of net OCS  
454 consumption (Fig. 1a). Around 15% WFPS<sub>lab</sub> OCS exchange rates increased again to a local  
455 maximum (in some cases again net producing OCS) at about 10% WFPS<sub>lab</sub> before they  
456 finally declined to zero exchange under completely dry conditions. The cornfield soils, (A1  
457 and A2), produced ~~the most OCS, up to 2 and~~ 13 pmol g<sup>-1</sup> h<sup>-1</sup>, followed by the 4.7 pmol g<sup>-1</sup> h<sup>-1</sup>  
458 from the grassland soil (A5) and 3.8 pmol g<sup>-1</sup> h<sup>-1</sup> OCS from the wheat field soil (A4),  
459 respectively. For the sugar beet soil (A3), OCS fluxes were < 1.09 pmol g<sup>-1</sup> h<sup>-1</sup> (undetectable)  
460 or negative (net OCS uptake) in the range from 65% to 15% WFPS<sub>lab</sub> but increased to a  
461 production of 1.5 pmol g<sup>-1</sup> h<sup>-1</sup> at about 10% WFPS<sub>lab</sub>. The ~~A4~~-soil from a wheat field had an  
462 almost identical OCS exchange profile to the cornfield soil (A1). The grassland soil (A5)  
463 produced up to 5 pmol g<sup>-1</sup> h<sup>-1</sup> OCS and was the only agricultural~~A~~ soil that emitted OCS >  
464 1.09 pmol g<sup>-1</sup> h<sup>-1</sup> within the range of moderate soil moisture. Both, rainforest soil samples (F1  
465 and F2)~~rainforest samples~~ exchanged OCS above detection levels only at very high and low  
466 soil moisture; both acted as small net sinks for ~~as~~-OCS in between (Fig. 1b). The two sandy  
467 desert soils, (D1 and D2, sand content  $\geq 90\%$  determined according to ISO 11277), produced  
468 up to 3.3 to 9.56 pmol g<sup>-1</sup> h<sup>-1</sup> at high soil moisture, with fluxes declining as the soil dried out  
469 (Fig. 1c).

470 We measured thiocyanate in soil extracts at start of the dry-out experiments where high P<sub>OCS</sub>  
471 was observed, because a pathway of thiocyanate hydrolase has been proposed for OCS  
472 production (P<sub>OCS</sub>). Thiocyanate concentrations for the desert soils was very low, below  
473 detection for D1 (< 0.5 mg kg<sup>-1</sup>, ~~Environment Agency, 2011~~; grey point in Figure 2), and only  
474 0.65 mg SCN<sup>-</sup> kg<sup>-1</sup>, ~~but still detectable~~ for D2. For all other soils, thiocyanate concentrations  
475 ranged between 0.87 and 12.04 mg SCN<sup>-</sup> kg<sup>-1</sup>. For all soils except the agricultural soil (A2,3-)

476 not used in curve fitting), an increase in thiocyanate concentration coincided with a  
477 ~~logarithmic~~ decrease in the maximum observed OCS exchange rate at WFPS > 37%,  
478 OCS<sub>max, HM</sub> (see Fig. 2). The maximum OCS exchange rate and thiocyanate concentration for  
479 the agricultural soil (A2, green circle) are considered as an outlier, possibly due to the release  
480 of thiocyanate from fine roots during the sieving procedure.

481 While the agricultural soils (A) and forest soils (F) ~~soils~~ showed similar patterns that included  
482 a second increase in OCS production at ~~below~~ about 10% WFPS<sub>lab</sub>, desert soils (D) ~~soils~~ only  
483 produced OCS. The different behavior for OCS exchange from desert soils may be related to  
484 differences in soil properties: desert soils (D) ~~soils~~ are characterized by high pH (carbonate  
485 contents of 1.89 to 0.55% for D1 and D2 soils respectively) and high amount of total sulfur  
486 (0.13 to 3.74%). Highest NO<sub>3</sub><sup>-</sup> concentrations from a desert soil (D2) and a cornfield soil  
487 (A2) correlated with largest net OCS exchange rates (see Table 1). The high NH<sub>4</sub><sup>+</sup> correlated  
488 with low maximum OCS exchange rate at start of the experiment, respectively. ~~however,~~  
489 thiocyanate levels are non-detectable or very low. The availability of thiocyanate is negatively  
490 correlated to the overall magnitude of OCS fluxes (see Section 4.1), in particular the ability to  
491 net produce OCS at WFPS > 37%.

492

493 **3.2 ~~Bacteria and F~~ ungi activity correlated with ~~involved in~~ P<sub>OCS</sub> and U<sub>OCS</sub> from a mid-**  
494 **latitude cornfield soil (A1) soil ~~over~~ under the range of soil moisture ~~different~~ OCS**  
495 **fumigation (sequencing)**

496 The highly conserved 16S rRNA gene reflects differences in bacterial and archaeal  
497 populations. Overall, the sequencing approach did not result in significant differences in 16S  
498 rRNA ~~transcript~~ relative abundance for bacterial classes for the cornfield soil (A1) ~~soil~~  
499 fumigated at 50 versus 1000 ppt OCS at moderate soil moisture (Fig. 3a). In contrast, for ITS

500 ~~RNA transcripts~~ the relative abundance of Ascomycota (p-value = 0.006) indicated these were  
501 significantly more active under 1000 ppt OCS compared to 50 ppt OCS, which could suggest  
502 their importance for OCS exchange (Fig. 4). ~~and Basidiomycota (p-value = 0.034) indicated~~  
503 ~~these were significantly more active under 1000 ppt OCS compared to 50 ppt OCS, indicating~~  
504 ~~their importance for OCS exchange (Fig. 3b).~~ Within the phylum of Ascomycota the largest  
505 difference in RNA relative abundance from 50 ppt to 1000 ppt OCS resulted for the class  
506 Sordariomycetes (p-value = 0.029). Within the phylum Basidiomycota (p-value = 0.034) the  
507 largest difference in RNA relative abundance from 50 ppt to 1000 ppt OCS was observed for  
508 the class Cystobasidiomycetes (p-value = 0.009), also significantly more abundant in the OCS  
509 1000 ppt samples. For the phylum Zygomycota the RNA relative abundance decreased from  
510 50 ppt to 1000 ppt OCS (p-value = 0.035).

511

### 512 **3.3 Effect of [OCS] on NO release rate ~~fumigation on CO exchange~~**

513 For the investigation of the microbial groups involved in OCS production and consumption,  
514 we studied simultaneous OCS, NO (as a proxy for nitrification) and CO exchange for a fresh  
515 and 40 °C dried cornfield soil (A1) at 50 ppt and 1000 ppt OCS (see supplementary  
516 information). The maximum NO release rate for the 40 °C dried cornfield sample (Fig. 5a)  
517 was 726.9 pmol g<sup>-1</sup> h<sup>-1</sup> at 50 ppt OCS and 1102.7 pmol g<sup>-1</sup> h<sup>-1</sup> at 1000 ppt OCS at 37%  
518 WFPS<sub>lab</sub>, whereas for the fresh sample NO release rates were substantially lower (Fig. 6d).  
519 The soil sample from the spruce forest Sparneck, Germany (F3) released maximal NO of  
520 5579.5 pmol g<sup>-1</sup> h<sup>-1</sup> at 50 ppt OCS and 7159.4 pmol g<sup>-1</sup> h<sup>-1</sup> at 1000 ppt OCS and 41% WFPS<sub>lab</sub>  
521 (Fig 5b), respectively. The observed increase of NO release rate at 1000 ppt OCS compared to  
522 50 ppt OCS suggests that microbial groups involved in the nitrogen cycle (e.g. nitrifiers),  
523 which utilize CA and RubisCO, might had contributed to simultaneous exchange of NO and  
524 OCS under moderate soil moisture. Interestingly, at 1000 ppt OCS its OCS release rate was

525 lower (indicating OCS consumption increased) and coincided with low CO release compared  
526 to 50 ppt OCS under moderate soil moisture regime (see S. 2).~~mid-latitude cornfield soil (A1)~~  
527 ~~at 50 ppt OCS fumigation OCS exchange rates reached up to  $2 \text{ pmol g}^{-1} \text{ h}^{-1}$  at 50 %  $\text{WFPS}_{\text{lab}}$~~   
528 ~~and at 5 %  $\text{WFPS}_{\text{lab}}$  (green squares, Fig. 4a). Even if the soil was fumigated with 1000 ppt~~  
529 ~~OCS, net OCS production at 7 and  $> 60$  %  $\text{WFPS}$  was still observed. Under 1000 ppt OCS~~  
530 ~~fumigation at 21%  $\text{WFPS}_{\text{lab}}$  (red squares, Fig. 4a), net OCS uptake was observed, with~~  
531 ~~exchange rates up to  $2.4 \text{ pmol g}^{-1} \text{ h}^{-1}$ . Interestingly, lowest OCS release (indicating OCS~~  
532 ~~consumption increased) and lowest CO release under 1000 ppt OCS fumigation occurred~~  
533 ~~simultaneously under moderate soil moisture regime, indicating that CO consumption relative~~  
534 ~~to production increased (see Fig. 4b). This indication of an increased CO uptake and OCS~~  
535 ~~uptake under moderate soil moisture and 1000 ppt OCS fumigation guided us to the~~  
536 ~~hypothesis that another enzyme than CA might contribute to simultaneous exchange of CO~~  
537 ~~and OCS under moderate soil moisture.~~

538

### 539 **3.4 Effect of OCS fumigation on the ~~RNA relative abundance of~~ archaeal and bacterial** 540 **~~*amoA* gene and red-like *cbbL* gene~~ transcripts (qPCR) from a mid-latitude cornfield soil** 541 **(A1) and NO exchange**

542 The change in 16S rRNA ~~transcript~~ relative abundance for bacteria (sequencing) could not  
543 resolve significant differences for a cornfield soil (A1) soil fumigated at 50 versus 1000 ppt  
544 OCS at moderate soil moisture (see Section 3.1). Hence, qPCR assays have been used for the  
545 specific quantification ~~of RNA relative abundance~~ of the AOB and AOA *amoA* and red-like  
546 *cbbL* gene transcripts. For the fresh air dried A1 soil sample from a cornfield (A1) 34 AOB  
547 *amoA* transcripts per nanogram extracted DNA have been detected at 95%  $\text{WFPS}_{\text{lab}}$  with a  
548 continuous increase up to 221 transcripts per nanogram extracted DNA at 7%  $\text{WFPS}_{\text{lab}}$ , all at  
549 50 ppt OCS, respectively (see Fig. 6). 2,193 AOA *amoA* transcripts per nanogram extracted

550 DNA, have been detected at 33% WFPS<sub>lab</sub> with a continuous increase up to 39,494 transcripts  
551 at 7% WFPS<sub>lab</sub> at 50 ppt OCS (see Fig. 6). For red-like *cbbL* (RubisCO) 13,463 transcripts  
552 per nanogram extracted DNA have been detected at 95% WFPS<sub>lab</sub> with a continuous increase  
553 up to 45,033 transcripts per nanogram extracted DNA at 7% WFPS<sub>lab</sub>, all at 50 ppt OCS,  
554 respectively (see Fig 6).~~AOB *amoA* RNA relative abundance is very low. AOB *amoA*~~  
555 ~~decreased under 1000 ppt OCS (red point) compared to 50 ppt OCS (bright green point) at 21~~  
556 ~~% WFPS<sub>lab</sub> (see Fig. 5). For AOA *amoA* the RNA relative abundance increased under 1000~~  
557 ~~ppt OCS (purple point) compared to 50 ppt OCS (dark green point), but was not significant.~~  
558 ~~Interestingly, the maximum AOB *amoA* RNA relative abundance under 50 ppt occurred at~~  
559 ~~about 21 % WFPS<sub>lab</sub>, whereas the maximum AOA *amoA* RNA relative abundance occurred at~~  
560 ~~about 7 % WFPS<sub>lab</sub>. At 21 % WFPS<sub>lab</sub>, the red like *cbbL* (encoding the CO<sub>2</sub> fixation enzyme~~  
561 ~~RubisCO) RNA relative abundance, was lower (N=5, p < 0.05) under the 1000 ppt OCS~~  
562 ~~fumigation treatment (red diamond) compared to the 50 ppt OCS treatment (green diamond)~~  
563 ~~at 21 % WFPS<sub>lab</sub>. For both OCS fumigations at 50 and 1000 ppt net release of NO, which can~~  
564 ~~be used as proxy for nitrification, followed a similar pattern over the dry-out experiment than~~  
565 ~~the AOB *amoA* RNA relative abundance. At 1000 ppt OCS fumigation the net release of NO~~  
566 ~~was larger compared to 50 ppt OCS fumigation, and thus OCS fumigation seems to affect NO~~  
567 ~~release rates and thereby nitrification.~~

568

## 569 **4 Discussion**

### 570 **4.1 Interpretation of Explaining patterns of OCS exchange for ~~various soils~~ rewetted** 571 **and dried-out soils under ambient (500 ppt) OCS**

572 OCS is produced by the degradation of various S compounds. Thiocyanate has been  
573 considered as an important precursor for OCS (e.g. Conrad, 1996). Thus, it is likely that the



574 OCS production rate is correlated with the concentration of thiocyanate as a dominant  
575 intermediate of organic S compound degradation. Lehmann and Conrad (1996) added sodium  
576 thiocyanate to soil samples and found an increase in OCS production. Nonetheless, there is  
577 indication that also organic compounds might be precursors of OCS in soil (Smith and Kelly,  
578 1988; Kelly et al., 1993). In our study, all vegetated soils (i.e. not D1 and D2 desert soils)  
579 contained significant amounts of thiocyanate that likely were produced during decomposition  
580 of plant material (Bunk et al., 2017; Kelly et al., 1993). In two tropical forest soils,  
581 thiocyanate and OCS fluxes were at or close to detection limits. Over a range of moisture  
582 conditions, these soils consume any OCS produced and provide a (barely detectable) sink for  
583 OCS from the atmosphere (Whealan et al., 2016; Sun et al., 2017).~~is reported in literature to~~  
584 ~~be an important precursor for OCS (e.g. Conrad, 1996), thus, it can be expected that the OCS~~  
585 ~~production rate should be related to the amount of thiocyanate as a dominant product of~~  
586 ~~decomposition of organic sulfur compounds. Lehmann and Conrad (1996) added sodium~~  
587 ~~thiocyanate to soil samples and found an increase in OCS production. In this study, all~~  
588 ~~vegetated soils (i.e. not D1 and D2 desert soils) contained significant amounts of thiocyanate~~  
589 ~~that likely was produced during decomposition of plant tissue (e.g. compiled by Bunk et al.,~~  
590 ~~2017; Kelly et al., 1993). In the two tropical forest soils very low in overall S content,~~  
591 ~~thiocyanate and OCS fluxes were at or close to detection limits. Over a range of moisture~~  
592 ~~conditions, these soils consume any OCS produced and provide a (barely detectable) sink for~~  
593 ~~OCS from the atmosphere (Whelan, et al., 2016; Sun et al., 2017; Bunk et al., submitted). The~~  
594 ~~desert soils, although very low in thiocyanate, contained high bulk S, likely in the form of~~  
595 ~~inorganic sulfur compounds, such as calcium sulfate or sodium sulfate. In deserts such~~  
596 ~~enrichments of salts are the result of long term dry deposition (Michalski et a., 2004). These~~  
597 ~~crusts promote the abundance of sulfur metabolizing microbes in a few mm thick crusts on the~~  
598 ~~topsoil as reported from Wierzchos and co-workers (2011). These microbes might be able to~~  
599 ~~produce OCS from sulfate (Banwart and Bremner, 1976) or other S-containing precursors~~

600 ~~(Banwart and Bremner, 1975; Flöck et al., 1997, Lehmann and Conrad, 1996), and thus may~~  
601 ~~have high rates of OCS production that do not depend on organic S availability. The absence~~  
602 ~~of an OCS uptake mechanism in desert soils under moderate soil moisture might be explained~~  
603 ~~by low concentrations or inhibition of RubisCO through high pH and the presence of~~  
604 ~~carbonate (Lorimer and Pierce, 1989). Also very low amounts of organic matter might limit~~  
605 ~~the abundance and activity of heterotrophs, such as fungi, which are also involved in OCS~~  
606 ~~uptake (Ogawa et al., 2016).~~

607

608 The desert ~~In all~~ soils (D1 and D2), although exhibiting low thiocyanate concentrations,  
609 contained high bulk S, likely in the form of inorganic S compounds. In deserts such  
610 enrichments of inorganic salts are the result of long term dry deposition (Michalski et al.,  
611 2004). Microorganisms might be able to produce OCS from sulfate (Meredith et al., 2018<sup>a</sup>;  
612 Banwart and Bremner, 1976) or other S-containing precursors (Banwart and Bremner, 1975;  
613 Flöck et al.,1997; Lehmann and Conrad, 1996), and thus may have high rates of OCS  
614 production that do not depend on organic S availavility. The positive OCS net fluxes from  
615 desert soils (D1 and D2) at 500 ppt OCS suggest that OCS consumption in these soils is, if at  
616 all present, Low amounts of organic matter in these soils might limit the abundance and  
617 activity of heterotrophs, such as Actinobacteria (Ogawa et al., 2016). An alternative  
618 explanation is the inhibition of RubisCO through high pH and the presence of carbonate  
619 (Lorimer and Pierce, 1989). Both inorganic and organic S availability control OCS production  
620 rates in general (e.g. Meredith et al., 2018<sup>a</sup>; Banwart and Bremner, 1976; Banwart and  
621 Bremner, 1975; Flöck et al., 1997; Lehmann and Conrad, 1996), but rates of OCS  
622 consumption are controlled by different parameters (e.g. Kaisermann et al., 2018). And thus,  
623 net soil OCS exchange and its relation to moisture is not linear dependent on further controls.

624 ~~OCS production is lower at higher soil moisture, even with increasing thiocyanate~~  
625 ~~concentrations, indicating that maybe also other precursors, like organic carbon compounds,~~  
626 ~~are needed for an efficient breakdown of sulfur compounds. There is indication from a~~  
627 ~~purified enzyme study for thiocyanate hydrolysis that at > 40 mM thiocyanate an inhibition by~~  
628 ~~the substrate was observed (Katayama et al., 1992). Both inorganic and organic S availability~~  
629 ~~control OCS production rates in general, but rates of OCS consumption are controlled by~~  
630 ~~different parameters. This may mean that net soil OCS exchange and its relation to moisture~~  
631 ~~are not easily predicted.~~

632  
633 There is already evidence that OCS exchange correlates with total nitrogen content  
634 (Kaisermann et al., 2018). In our study the highest nitrate concentrations correspond to  
635 maximum OCS net exchange under high soil moisture. This is in agreement with a nitrate  
636 fertilization study in which substantial increase of OCS net fluxes from forest soils was the  
637 consequence (Melillo and Steudler, 1989). The correlations of  $\text{NO}_3^-$  and  $\text{NH}_4^+$  concentration  
638 with OCS net release rate at start of the experiment suggest that microbial nitrogen cycling is  
639 connected to OCS exchange.

640  
641 **4.2 Fungal activity correlated ~~The role of bacteria and fungi involved with~~ in  $\text{P}_{\text{OCS}}$  and**  
642  **$\text{U}_{\text{OCS}}$  from a mid-latitude cornfield soil ~~the (A1) soil~~ over the ~~whole~~ range of soil**  
643 **moisture ~~under different OCS fumigation (sequencing)~~**

644 Carbonic anhydrase is thought to be the most important enzyme involved in OCS uptake  
645 (Bunk et al. 2017). Masaki and co-workers (2016) concluded that fungal species may  
646 contribute differently to OCS exchange in soils, although some were net consumers of OCS,  
647 ~~since~~ pure cultures from strains of *Umbelopsis/Mortierella* sp. were net producers of OCS.

648 In our study, we found a significant difference in ITS RNA relative abundance for several  
649 fungi when OCS in ambient air was changed from 50 to 1000 ppt, indicating fungal  
650 sensitivity to OCS. Recent studies suggest that fungi containing CA might be responsible for  
651 OCS uptake (Ogawa et al., 2016; Bunk et al., 2017). In addition, enzymes involved in  
652 different CO<sub>2</sub> fixation pathways, including the CBB cycle, hydropropionate/hydroxybutyrate  
653 cycle (HP/HB), anaplerotic reactions of heterotrophic microorganisms (PEPCO), or the Wood  
654 Ljungdahl pathway might play a role for OCS. For example, using a specific inhibitor for CA  
655 leads to changed OCS flux (Kesselmeier et al., 1999). A possible explanation for the large  
656 differences in OCS exchange among the various soils investigated here might be a niche  
657 separation (here soil moisture) of gene expression and activity maxima under different  
658 moisture conditions for different OCS-converting enzymes: At high soil moisture the OCS  
659 production by hydrolysis of organic S compounds might be the dominant process, while at  
660 moderate soil moisture consumption of OCS by CO<sub>2</sub> assimilation might be the predominant  
661 process. Under moderate soil moisture we found a lower activity of Zygomycota and  
662 Tremellomycetes at 1000 ppt compared to 50 ppt OCS, whereas both Sordariomycetes  
663 (Ascomycota showed highest RNA relative abundance of overall fungi in the mid-latitude  
664 cornfield soil, A1) and Cystobasidiomycetes exhibited an increased metabolic activity (see  
665 Fig. 4). However, in addition to fungi the importance of phototrophs (algae) for CO<sup>18</sup>O and  
666 OCS exchange was demonstrated (Sauze et al., 2017).

667 ~~In our study we found a significant difference in ITS transcripts relative abundance for several~~  
668 ~~fungi when OCS in ambient air was changed from 50 to 1000 ppt, indicating fungal~~  
669 ~~sensitivity to OCS. Recent studies suggest that fungi containing CA might be responsible for~~  
670 ~~OCS uptake (Ogawa et al., 2016; Bunk et al., 2017). In addition, enzymes involved in~~  
671 ~~different CO<sub>2</sub> fixation pathways, including the CBB cycle,~~  
672 ~~hydroxypropionate/hydroxybutyrate cycle (HP/HB), anaplerotic reactions of heterotrophic~~

673 ~~microbes (PEPCO), or the Wood-Ljungdahl pathway might play a role for OCS exchange as~~  
674 ~~already investigated by the use of 6-ethoxy-2-benzothiazole-2-sulfonamide (EZ) as a specific~~  
675 ~~inhibitor for carbonic anhydrase (Kesselmeier et al., 1999). A possible explanation for the~~  
676 ~~large differences in  $P_{OCS}$  and  $U_{OCS}$  among the various soils investigated here might be a niche~~  
677 ~~separation (here: soil moisture) of different enzymes: At high soil moisture the hydrolysis of~~  
678 ~~organic S compounds to produce OCS might be the dominant process, while at moderate soil~~  
679 ~~moisture consumption of OCS with  $CO_2$  fixation might be the predominant process. Under~~  
680 ~~moderate soil moisture we found a lower activity of Zygomycota and Tremellomycetes under~~  
681 ~~1000 ppt compared to 50 ppt OCS, whereas Sordariomycetes (Ascomycota showed highest~~  
682 ~~RNA relative abundance of overall fungi in A1 soil) and Cystobasidiomycetes showed an~~  
683 ~~increased activity, respectively (see Fig. 3). Our results are supported by a study which found~~  
684 ~~that in agricultural soils, where the lignin content of organic matter is typically low,~~  
685 ~~Ascomycota are the key decomposers (Ma et al., 2013). Under low soil moisture other~~  
686 ~~enzyme processes, such as the  $CS_2$  hydrolase pathway for OCS production from archaea,~~  
687 ~~which might be more resistant to desiccation, could be responsible for net OCS production~~  
688 ~~(Smeulders et al., 2011), while consumption rates decline at low soil moisture.~~

689 Carbonic anhydrase is not a single enzyme but rather a group of 5 different families ( $\alpha$ ,  $\beta$ ,  $\gamma$ ,  $\delta$   
690 and  $\zeta$ ). A recent study suggest that Actinobacteria contain a CA-like gene, to which also OCS  
691 hydrolase are similar (Ogawa et al., 2016). Thus, these bacteria may contain a hydrolase that  
692 might be specialized to uptake OCS. The importance of phototrophs (eukaryotic algae) for  
693 OCS exchange was already demonstrated (Sauze et al., 2017). There is evidence that different  
694 CAs and likely other enzymes are involved in the OCS exchange (Meredith et al.,  
695 2018<sup>b</sup>). There is indication that  $\beta$ -CA and  $\alpha$ -CA differ in their OCS hydrolysis rates (Ogawa et  
696 al., 2013, Ogawa et al., 2016; Ogée et al., 2016). However, the different families of CA are  
697 not really clustering into metabolically and phylogenetically distinct groups but rather show a

698 ~~complex distribution based on their evolution in fungi, bacteria and archaea (Smith et al.,~~  
699 ~~1999). In CO<sub>2</sub> fixation CA is well known to act as an “upstream amplificatory” for e.g.~~  
700 ~~RubisCO and PEPCO<sub>ep</sub>CO. Due to similarity of the OCS and CO<sub>2</sub> molecules, it seems~~  
701 ~~reasonable that for OCS consumption in chemical pathways of OCS consumption the roles of~~  
702 ~~RubisCO and PEPCO<sub>ep</sub>CO were might have been underestimated. There might be not only~~  
703 ~~a bulk k<sub>cat</sub> and K<sub>m</sub> (Ogée et al., 2016), but rather multiple parameters for diverse types of CA~~  
704 ~~(Meredith et al., 2018<sup>b</sup>) and maybe even for other enzymes such as RubisCO (this study)~~  
705 ~~necessary to fully understand and model the microbial OCS production and consumption from~~  
706 ~~soils. In theory, the ubiquitous CA should result a uniform response of soil moisture, with a~~  
707 ~~single optimum function as modeled in Ogée et al., (2016). Hence, a more complicated~~  
708 ~~pattern in OCS exchange as observed in this study is more likely the result of an ensemble of~~  
709 ~~enzymes with maximum activities at distinct soil moisture ranges. Within such an ensemble~~  
710 ~~we want to point out that CA irreversibly catalyzes OCS to H<sub>2</sub>S and CO<sub>2</sub> (Ogawa et al., 2016;~~  
711 ~~Protoschill Krebs and Kesselmeier, 1992; Protoschill Krebs et al., 1995, 1996; Blezinger et~~  
712 ~~al., 2000; Notni et al., 2007). Hence, the pattern in activity of different fungal genera under~~  
713 ~~moderate soil moisture might be caused by differences in tolerance/inhibition or even~~  
714 ~~utilization of H<sub>2</sub>S.~~

715

#### 716 **4.3 Effect of [OCS] fumigation on NCO release rateexchange—similarity to N<sub>2</sub>O:NO** 717 **ratio?**

718 While in other studies the OCS production and consumption are disentangled by utilizing  
719 different inlet mixing ratios (Kaisermann et al., 2018), we introduce a new concept of  
720 measuring different gases, such as NO release rate (as a proxy for nitrification), simultaneous  
721 to OCS exchange rates to better understand which microbial groups are involved in OCS  
722 production and consumption. Interestingly under moderate soil moisture conditions, where

723 lowest OCS net release at 1000 ppt OCS occurred (see S. 1), maximum NO release rates were  
724 detected. Under moderate to low soil moisture NO net production is predominantly accepted  
725 to originate from nitrification (e.g. Oswald et al., 2013). NO release rates increased under  
726 elevated OCS fumigation, which agrees with our results. Based on the correlations with  $\text{NH}_4^+$   
727 and  $\text{NO}_3^-$  concentrations (section 4.1), we hypothesize that microbial groups involved in the  
728 nitrogen cycle (e.g. nitrifiers and potentially denitrifiers) are involved in the OCS exchange.  
729 Interestingly, at 1000 ppt OCS its release was lower (indicating OCS consumption increased)  
730 and coincided with low CO release compared to 50 ppt OCS under moderate soil moisture  
731 (see S. 2). It is worth to note the correlation of OCS and CO exchange rates (see  
732 supplementary information S. 2), but given the lack of CO ambient mixing ratios at the inlet  
733 and the lack of CO dehydrogenase activity measurement, we cannot fully explain that result.  
734 ~~OCS fluxes from litter samples incubated in the laboratory have been measured (Bunk et al.,~~  
735 ~~submitted) and are in good agreement with a field study at Hytiälä, Finland (Sun et al., 2017).~~  
736 ~~Since in our incubations CO was scrubbed, we decided to reanalyze the field dataset from Sun~~  
737 ~~and co-workers (2017, doi:10.5281/zenodo.322936) in a similar way to express averaged~~  
738 ~~OCS:CO ratio over  $\text{WFPS}_{\text{field}}$  moisture classes. The OCS:CO ratio shows a clear optimum~~  
739 ~~function under moderate and high soil moisture (grey optimum function, Fig. 6). For the A1~~  
740 ~~agricultural soil we found a maximum activity of Sordariomycetes (Ascomycota) and~~  
741 ~~Cystobasidiomycetes under moderate soil moisture during fumigation with 1000 ppt OCS~~  
742 ~~(where maximum OCS consumption was detected). Since we found a decrease in RNA~~  
743 ~~relative abundance for Tremellomycetes (Basidiomycota) and Basidiomycota are known to~~  
744 ~~play the key degraders in forest soils for lignin rich litter (Blackwood et al., 2007), we~~  
745 ~~hypothesise that they contribute to OCS and CO exchange at elevated soil moisture. At such~~  
746 ~~elevated soil moisture from 40 – 60 %  $\text{WFPS}$  OCS consumption was detected (Bunk et al.,~~  
747 ~~submitted), even confirmed to be correlated to abundance of fungi (Sauze et al., 2017) and is~~  
748 ~~corresponding to our second maximum in OCS:CO ratio (see Fig. 6).~~

749 ~~To the best of our knowledge we could not find any process involving only CA that would~~  
750 ~~result in this distinct pattern by simultaneously affecting the uptake of OCS and CO.~~  
751 ~~However, for alternative enzymes, e.g. RubisCO and PepCO, that have been shown to be at~~  
752 ~~least partly involved in OCS exchange (Kesselmeier et al., 1999; Lorimer and Pierce, 1989), a~~  
753 ~~simultaneous consumption of CO and OCS seems possible. Our results (fumigation~~  
754 ~~performed at 1000 ppt OCS) also point out that the correlations of microbial activity to OCS~~  
755 ~~consumption are difficult to interpret, since both a microbial production of OCS as well as a~~  
756 ~~utilization of OCS as sulfur and/or energy source can affect the microbial activity and overall~~  
757 ~~differences are small. The 2 distinct optima in OCS:CO ratio might be related to different~~  
758 ~~kinetics of CO and OCS consumption for distinct microbial groups at about 46 % and 21 %~~  
759 ~~WFPS (see Fig. 6), respectively. This differentiation of 2 OCS consumption processes based~~  
760 ~~on CO and OCS metabolism is supported by different patterns of OCS consumption rate~~  
761 ~~coefficients  $k_{OCS}$  reported from Bunk et al., (submitted) and by a simultaneous increase in~~  
762 ~~OCS uptake rates and bacterial and fungal abundance in alkaline soils (Sauze et al., 2017).~~

763 ~~All of our incubations were performed aerobically and CH<sub>4</sub> was scrubbed from the inlet air.~~  
764 ~~Therefore, our analysis focused only on a selected subset of microbial groups that might be~~  
765 ~~involved in the OCS exchange. We excluded methanogenic archaea and acetogens (where~~  
766 ~~only a low number of sequences was obtained). Under anaerobic conditions in the field, they~~  
767 ~~can use the Wood-Ljungdahl pathway for CO<sub>2</sub> fixation and CODH and thus might also be~~  
768 ~~involved in OCS uptake at high soil moisture. There is evidence that ammonia oxidizing~~  
769 ~~bacteria and methanotrophs can co-oxidize CO aerobically (Jones et al., 1983; Jones et al.,~~  
770 ~~1984), and *Methylococcus capsulatus* and *Methylocaldum szegediense* O-12 utilize the CBB~~  
771 ~~cycle for carbon fixation (Rasigraf et al., 2014). Since in our study the inlet air was free of~~  
772 ~~methane, we could not observe the activity of methanotrophs. However, under elevated CH<sub>4</sub>~~  
773 ~~conditions in the field methanotrophs should consume CO and might also be involved in OCS~~



774 ~~exchange via RubisCO under moderate soil moisture range. Hence, in our laboratory~~  
775 ~~incubations ammonia oxidizing bacteria (also utilizing RubisCO and consuming OCS) might~~  
776 ~~be the dominant CO consumers and NO net producers. NO net production, commonly~~  
777 ~~accepted to originate from nitrification (e.g. Oswald et al., 2013) under low to moderate soil~~  
778 ~~moisture, increased under elevated OCS fumigation, which is in agreement with our results.~~  
779 ~~Thus, we suggest the use of OCS:CO ratio to separate the activity of different microbial~~  
780 ~~groups (AOB, methanotrophs, Sordariomycetes and Cystobasidomycetes versus Zygomycota~~  
781 ~~and Tremellomycetes) in a similar way than the N<sub>2</sub>O:NO ratio is used to separate the activity~~  
782 ~~of nitrifiers and denitrifiers (Davidson et al., 2000).~~

783

#### 784 **4.4 Effect of OCS fumigation on the 16S rRNA relative abundance of archaeal and** 785 **bacterial *amoA* gene and red-like *cbbL* gene transcripts (qPCR) and NO exchange**

786 Despite the evidence for nitrogen-dependent OCS exchange, the mechanisms are not  
787 understood (Kaisermann et al., 2018; Melillo and Steudler, 1989). Fungi are considered as  
788 relevant OCS consumers utilizing CA over the whole range of soil moisture (Bunk et al.,  
789 2017). However, there is increasing evidence that OCS consumption is not performed by a  
790 single metabolic process (Sauze et al., 2017; Meredith et al., 2018<sup>b</sup>; our study). Our data  
791 suggest that indeed CA plays an important role for OCS exchange, but also for further  
792 enzymes (e.g. RubisCO) being involved in CO<sub>2</sub> assimilation. At high soil moisture, anaerobes  
793 such as, acetogens, methanogens, and sulfate reducers, might had been active and might had  
794 been capable of catalyzing the oxidation of CO via CODH via the Wood-Ljungdahl pathway  
795 to fix CO<sub>2</sub> (Davidova et al., 1993; Ragsdale, 2004). Since the incubations were performed  
796 under oxic conditions and CO production was observed from the soil (inlet air was free of  
797 CO), the contribution of CO consumption via the Wood Ljungdahl pathway from anaerobic  
798 pockets at elevated soil moisture range might had been underestimated. Under moderate soil

799 moisture, reduced CO production may be predominantly attributed to the activity of aerobic  
800 CO<sub>2</sub> assimilating microorganisms (Bédard & Knowles, 1989; Jones & Morita, 1983; Jones et  
801 al., 1984; Bender and Conrad, 1994) with minor importance of the aerobic CODH pathway  
802 (Conrad et al, 1981). Our study suggests that under moderate soil moisture prokaryotic  
803 autotrophs, Sordariomycetes (Ascomycota) and Cystobasidiomycetes were dominant OCS  
804 consumers in the mid-latitude agricultural soil (A1). Our study highlights how gene  
805 expression information on enzymes involved in CO<sub>2</sub> fixation combined with the simultaneous  
806 assessment of NO and CO as well as OCS exchange are useful for understanding the complex  
807 microbial controls on net OCS exchange from soils.

808 We restricted the discussion of the microbial groups involved in OCS consumption to fungi  
809 since the involvement of bacterial groups would have required a more specific approach such  
810 as stable isotope probing to prove their involvement. The strength of our study is the proven  
811 correlations of OCS net exchange to NH<sub>4</sub><sup>+</sup>, NO<sub>3</sub><sup>-</sup> (at start of the incubations), NO exchange  
812 and functional genes (AOB and AOA amoA and red-like cbbL RubisCO over drying out at 50  
813 ppt OCS).~~For the experiments with the A1 soil, the only difference was the level of OCS~~  
814 fumigation, which was either 50 ppt or 1000 ppt. While there is evidence that theoretically for  
815 a 10<sup>6</sup> higher level of CO<sub>2</sub>, RubisCO can be saturated (Bunk et al., 2017), the level of OCS  
816 fumigation applied in this study should not lead to saturation of either CA or RubisCO.  
817 Reported K<sub>M</sub> values of CA for OCS are 0.039 mM (extracted from pea leaves, Protosehill-  
818 Krebs et al., 1996) and 1.86 mM (from *Bos Taurus*, Haritos and Dojehinov, 2005). The only  
819 reported K<sub>M</sub> value of RubisCO for OCS reported in literature we know of is 1.8 mM  
820 (extracted from spinach, Lorimer and Pierce, 1989). To competitively inhibit an enzyme, the  
821 concentration in the soil water would have to at least reach the enzyme's K<sub>M</sub> value for that  
822 substrate. However, following Henry's Law and the according constants as published in  
823 Sander (2015) the soil water concentration will only be 2.57 x 10<sup>-8</sup> mM. Therefore,

824 ~~competitive inhibition of either enzyme must be considered highly unlikely (see Fig. 7). It~~  
825 ~~also has been shown that the thiocarbamylation by a molecule of OCS can inhibit CO<sub>2</sub>~~  
826 ~~fixation via RubisCO and the enzyme is incapable for both, CO<sub>2</sub> and OCS uptake (Lorimer~~  
827 ~~and Pierce, 1989). The simultaneous decrease of AOB *amoA* gene and *cbbL* gene at 21 %~~  
828 ~~WFPS for A1 soil under 1000 ppt OCS fumigation seems likely to be caused by~~  
829 ~~thiocarbamylation. Under a continuous OCS fumigation the thiocarbamylation step of~~  
830 ~~RubisCO inhibits the carboxylation/thiocarboxylation step (Lorimer and Pierce, 1989) and~~  
831 ~~thereby the main carbon assimilation of AOB and methanotrophs. This might result a reduced~~  
832 ~~activity of AOB and methanotrophs utilizing RubisCO which was detected as decrease of~~  
833 ~~AOB *amoA* under 1000 ppt OCS fumigation. This reduced activity might explain the decrease~~  
834 ~~in RubisCO which was observed in this study under 1000 ppt OCS fumigation.~~

835 ~~Although the increase of AOA *amoA* RNA relative abundance at 1000 ppt OCS compared to~~  
836 ~~50 ppt OCS under 21 % WFPS<sub>lab</sub> was not significant, it indicates that AOA might outcompete~~  
837 ~~AOB and produce more NO without consuming CO (King and Weber, 2007) under 21 to 7 %~~  
838 ~~WFPS<sub>lab</sub>. This is consistent with a recent study reported the higher transcriptional activity for~~  
839 ~~AOA *amoA* under such low soil moisture from a dryland soil, suggesting that available~~  
840 ~~moisture might act as niche separation for AOA and AOB (Behrendt et al., 2017). A similar~~  
841 ~~interaction of the sulfur and nitrogen cycle was discovered already in a study which reported~~  
842 ~~OCS exchange from soils under fertilization with ammonium nitrate (Sauze et al., submitted).~~  
843 ~~Nitrifying and methanotrophic organisms are also capable of metabolising other compounds~~  
844 ~~such as CO (Bender and Conrad 1994).~~

845

## 846 **5 Conclusions**

847 Fungi are ~~considered accepted~~ as dominant microbial OCS consumers in literature, which  
848 may utilize ~~utilizing~~ CA over the whole range of soil moisture (Bunk, et al., 2017). However,  
849 there is increasing evidence that OCS consumption is not performed by a single metabolic  
850 process (Kaisermann et al., 2018; Bunk et al., submitted; Sauze et al., 2017; Meredith et al.,  
851 2018<sup>b</sup>, this study). Our data suggest that indeed CA plays an important role for OCS  
852 exchange, but the role of other enzymes involved in CO<sub>2</sub> fixation might have been  
853 underestimated. At high soil moisture creating anoxia, acetogens, methanogens and sulfate  
854 reducers are capable of catalyzing the oxidation of CO (Davidova et al., 1993; Ragsdale,  
855 2004). Our study suggests that under moderate soil moisture autotrophs (e.g. AOB),  
856 Sordariomycetes (Ascomycota) and Cystobasidomycetes are likely the dominant OCS  
857 consumers in the mid-latitude agricultural soil (A1). Our study highlights that simultaneous  
858 assessment of enzymes involved in CO<sub>2</sub> assimilation and simultaneous assessment of NO and  
859 potentially CO as well as OCS exchange is useful for disentangling the complex microbial  
860 controls of net OCS exchange from soils. Our study is the first assessment of the  
861 environmental significance of different microbial groups producing and consuming OCS by  
862 various enzymes other than CA. A combination of stable isotope probing with <sup>32</sup>S-labelled  
863 OCS plus metagenomics is required to prove our conclusions that further enzymes beyond CA  
864 are involved in OCS conversion. Our study is a first important step towards the understanding  
865 of the mechanism of microbial OCS consumption and production in soils. ~~Distinct maxima in~~  
866 the OCS:CO ratio support the molecular data and all together point towards the importance of  
867 RubisCO from AOB and methanotrophs for OCS consumption under moderate soil moisture  
868 regimes.

869 ~~It is known that at high soil moisture acetogens, methanogens, and sulfate reducers are~~  
870 ~~capable of catalyzing the oxidation of CO via CODH anaerobically via the Wood-Ljungdahl~~  
871 ~~pathway to fix CO<sub>2</sub> (Davidova et al., 1993; Ragsdale, 2004). Since the incubations were~~

872 ~~performed under aerobic conditions and CO production was observed from the soil (inlet air~~  
873 ~~was free of CO), the contribution of CO consumption via the Wood-Ljungdahl pathway from~~  
874 ~~anaerobic pockets at elevated soil moisture range might be underestimated. Under moderate~~  
875 ~~soil moisture, reduced CO production is mainly attributed to activity of AOB and~~  
876 ~~methanotrophs (Bédard & Knowles, 1989; Jones & Morita, 1983; Jones et al., 1984; Bender~~  
877 ~~and Conrad, 1994) with minor importance of the aerobic CODH pathway (Conrad et al.,~~  
878 ~~1981). Our study suggests that under moderate soil moisture autotrophs (AOB and~~  
879 ~~methanotrophs), Sordariomycetes (Ascomycota) and Cystobasidiomycetes are dominant OCS~~  
880 ~~consumers in the A1 mid-latitude agricultural soil. We discuss the role of Zygomycota and~~  
881 ~~Tremellomycetes (Basidiomycetes) as additional important OCS consumers under elevated~~  
882 ~~soil moisture in lignin-rich organic horizons in forest soils. This study highlights how~~  
883 ~~metabolic information related to enzymes involved in CO<sub>2</sub> fixation, inferred because we were~~  
884 ~~able to simultaneously assess CO and NO as well as OCS exchange, are useful for~~  
885 ~~disentangling the complex microbial controls on net OCS exchange from soils. Our study is~~  
886 ~~the first assessment of the environmental significance of different microbial groups producing~~  
887 ~~and consuming OCS by various enzymes other than CA.~~

888

889 **Data availability.** Raw sequencing data were deposited in the NCBI SRA accession number  
890 SRP121207, BioProjectID PRJNA415548. Data for trace gas release are stored in a database  
891 (<http://bexis2.uni-jena.de/>) and are available on request.

892 **Competing interests.** The authors declare that they have no conflict of interest.

893

894 **Acknowledgements**

895 The work has been funded by the Max Planck Society and Deutsche Forschungsgemeinschaft  
896 (DFG) CRC 1076 “AquaDiva”. We thank Alexander Moravek, Dianming Wu, and Moawad  
897 Badawy for support in collecting the soil samples.

898

- 900 Abarenkov, K., Nilsson, R. H., Larsson, K. H., Alexander, I. J., Eberhardt, U., Erland, S.,  
 901 Høiland, K., Kjøller, R., Larsson, E., Pennanen, T., Sen, R., Taylor, A. F. S., Tedersoo, L.,  
 902 Ursing, B. M., Vrålstad, T., Liimatainen, K., Peintner, U., & Kõljalg, U. (2010). The  
 903 UNITE database for molecular identification of fungi – recent updates and future  
 904 perspectives. *New Phytol.* 186: 281-285.
- 905 Alber, B. E., (2009): Autotrophic CO<sub>2</sub> Metabolism. *Encyclopedia of Microbiology* 18-31.
- 906 Altschul, S.F., Gish, W., Miller, W., Myers, E.W. & Lipman, D.J. (1990). "Basic local  
 907 alignment search tool." *J. Mol. Biol.* 215: 403-410.
- 908 Badger, M. R., Bek, E. J. (2008). Multiple Rubisco forms in proteobacteria: their functional  
 909 significance in relation to CO<sub>2</sub> acquisition by the CBB cycle. *Journal of Experimental*  
 910 *Botany* 59 (7): 1525-1541.
- 911 Baldrian, P., Kolařík, M., Stursová, M., Kopecký, J., Valášková, V., Větrovský, T.,  
 912 Zifčáková, L., Snajdr, J., Řídl, J., Vlček, C., Voříšková, J. (2012): Active and total  
 913 microbial communities in forest soil are largely different and highly stratified during  
 914 decomposition. ISME Journal 6 (2): 248-258, doi: 10.1038/ismej.2011.95.
- 915 Banwart, W. L., & Bremner, J. M. (1976). Volatilization of sulfur from unamended and  
 916 sulfate-treated soils. *Soil Biol. Biochem.* 8 (1), 19-22.
- 917 Banwart, W. L., & Bremner, J. M. (1975). Formation of volatile sulfur compounds by  
 918 microbial decomposition of sulfur-containing amino acids in soils. *Soil Biol. Biochem.* 7  
 919 (6), 359-364.
- 920 Bates, S. T., Berg-Lyons, D., Caporaso, J. G., Walters, W. A., Knight, R., & Fierer, N. (2011).  
 921 Examining the global distribution of dominant archaeal populations in soil. *ISME J* 5 (5):  
 922 908-917.
- 923 Bédard, C. & Knowles, R. (1989). Physiology, biochemistry and specific inhibitors of CH<sub>4</sub>,  
 924 NH<sub>4</sub><sup>+</sup> and CO oxidation by methanotrophs and nitrifiers. *Microbiol. Rev.* 53, 68-84.
- 925 Behrendt, T., Veres, P. R., Ashuri, F. A., Song, G., Flanz, M., Mantimin, B., Bruse, M.,  
 926 Williams, J., & Meixner, F. X. (2014). Characterisation of NO production and consumption:  
 927 new insights by an improved laboratory dynamic chamber technique. *Biogeosciences* 11:  
 928 5463-5492.
- 929 Behrendt, T., Braker, G., Song, G., Pommerenke, B., and Doersch, P. (2017). Nitric oxide  
 930 emission response to soil moisture is linked to transcriptional activity of functional  
 931 microbial groups. *Soil Biology and Biochemistry* 115: 337-345.
- 932 Bender, M., & Conrad, R. (1994). Microbial oxidation of methane, ammonium and carbon  
 933 monoxide, and turnover of nitrous oxide and nitric oxide in soils. *Biogeochemistry* 27: 97-  
 934 112.
- 935 Berry, J., Wolf, A., Campbell, E., Baker, I., Blake, N., Blake, D., Denning, A. S., Kawa, R.,  
 936 Montzka, S. A., Seibt, U., Stimler, K., Yakir, D., & Zhu, Z. (2013). A coupled model of the  
 937 global cycles of carbonyl sulfide and CO<sub>2</sub>: A possible new window on the carbon cycle.  
 938 *Journal of Geophysical Research: Biogeosciences* 118, 842-852, doi: 10.1002/jgrg.20068.
- 939 Blazewicz, S. J., Barnard, R. L., Daly, R. A., Firestone, M. K. (2013). Evaluating rRNA as an  
 940 indicator of microbial activity in environmental communities: limitations and uses. ISMEJ.  
 941 7 (11): 2061-2068.
- 942 ~~Blackwood, C. B., Waldrop, M. P., Zak, D. R., Sinsabough, R. L. (2007). Molecular analysis~~  
 943 ~~of fungal communities and laccase genes in decomposing litter reveals differences among~~  
 944 ~~forest types but no impact of nitrogen deposition. *Environmental Microbiology* 9: 1306-~~  
 945 ~~1316.~~
- 946 Blezinger, S., Wilhelm, C., & Kesselmeier, J. (2000). Enzymatic consumption of carbonyl  
 947 sulfide (COS) by marine algae. *Biogeochemistry* 48, 185-197.

948 Blonquist, J. M., Montzka, S. A., Munger, W., Yakir, D., Desai, A. R., Dragoni, D., Griffis,  
949 T. J., Monson, R. K., Scott, R. L., & Bowling, D. R. (2011). The potential of carbonyl  
950 sulfide as a proxy for gross primary production at flux tower sites. *Journal of Geophysical*  
951 *Research* 116, G04019, doi: 10.1029/2011JG001723.

952 Brühl, C., Lelieveld, J., Crutzen, P. J., & Tost, H. (2012). The role of carbonyl sulphide as a  
953 source of stratospheric sulphate aerosol and its impact on climate. *Atmos. Chem. Phys.* 12,  
954 1239-1253.

955 Bunk, R., Behrendt, T., Yi, Z., Andreae, M. O., & Kesselmeier, J. (2017). Exchange of  
956 carbonyl sulfide (OCS) between soils and atmosphere under various CO<sub>2</sub> concentrations.  
957 *Journal of Geophysical Research Biogeosciences* 122, doi: 10.1002/2016JG003678.

958 Campbell, J. E., Carmichael, G. R., Chai, T., Mena-Carrasco, M., Tang, Y., Blake, D. R.,  
959 Blake, N. J., Vay, S. A., Collatz, G. J., Baker, I., Berry, J. A., Montzka, S. A., Sweeny, C.,  
960 Schnoor, J. L., & Stanier, C. O. (2008). Photosynthetic control of atmospheric carbonyl  
961 sulfide during the growing season. *Science* 322, 1085-1088.

962 Campbell, J. E., Berry, J. A., Seibt, U., Smith, S. J., Montzka, S. A., Launois, T., Belviso, S.,  
963 Bopp, L., & Laine, M. (2017). Large historical growth in global terrestrial gross primary  
964 production. *Nature* 544, 84-87, doi: 10.1038/nature22030.

965 Caporaso, J.G., Kuczynski, J., Stombaugh, J., Bittinger, K., Bushman, F.D., Costello, E.K.,  
966 Fierer, N., Gonzalez Pena, A., Goodrich, J.K., Gordon, J.I., Huttley, G.A., Kelley, S.T.,  
967 Knights, D., Koenig, J.E., Ley, R.E., Lozupone, C.A., McDonald, D., Muegge, B.D.,  
968 Pirrung, M., Reeder, J., Sevinsky, J.R., Turnbaugh, P.J., Walters, W.A., Widmann, J.,  
969 Yatsunencko, T., Zaneveld J., & Knight, R. (2010). QIIME allows analysis of high-  
970 throughput community sequencing data. *Nature Methods* 7 (5): 335-336,  
971 doi:10.1038/nmeth.f.303.

972 Catão, E. C. P., Lopes, F. A. C., Rubini, M. R., Nardoto, G. B., Prosser, J. I., Krüger, R. H.,  
973 (2016). Short-term impact of soybean management of ammonia oxidizers in a Brazilian  
974 savanna under restoration as revealed by coupling different techniques. *Biology and*  
975 *Fertility of Soils* 52, 1-12.

976 Conrad, R. (1996). Soil Microorganisms as Controllers of Atmospheric Trace Gases (H<sub>2</sub>, CO,  
977 CH<sub>4</sub>, OCS, N<sub>2</sub>O, and NO). *Microbiological Reviews* 60 (4): 609-640.

978 Conrad, R., & Seiler, W. (1985). Influence of temperature, moisture, and organic carbon on  
979 the flux of H<sub>2</sub> and CO between soil and atmosphere: Field studies in subtropical regions.  
980 *Journal of Geophysical Research: Atmospheres* 90 (D3), 5699-5709, doi:  
981 10.1029/JD090iD03p05699.

982 Conrad, R., Meyer, O., Seiler, W., (1981). Role of carboxydobacteria in consumption of  
983 atmospheric carbon monoxide by soil. *Applied Environmental Microbiology* 42: 211-215.

984 Conrad, R. & Seiler, W. (1980). Role of Microorganisms in the Consumption and Production  
985 of Atmospheric Carbon Monoxide by Soil. *Appl. Environ. Microbiol.* 40 (3), 437-445.

986 Cousins, A., Baroli, I., Badger, M. R., Ivakov, A., Lea, P. J., Leegood, R. C., von Caemmerer,  
987 S., 2007. The Role of Phosphoenolpyruvate Carboxylase during C<sub>4</sub> Photosynthetic Isotope  
988 Exchange and Stomatal Conductance. *Plant Physiol.* 145 (3), 1006-1017, doi:  
989 10.1104/pp.107.103390.

990 Davidova, M. N., Tarasova, N. B., Mukhitova, F. K., & Karpilova, I. U. (1993). Carbon  
991 monoxide in metabolism of anaerobic bacteria. *Can. J. Microbiol.* 40, 417-425.

992 ~~Davidson, E. A., Keller, M., Erickson, H. E., Verchot, L. V., Veldkamp, E. (2000). Testing a~~  
993 ~~Conceptual Model of Soil Emissions of Nitrous and Nitric Oxides: Using two functions~~  
994 ~~based on soil nitrogen availability and soil water content, the hole in the pipe model~~  
995 ~~characterizes a large fraction of the observed variation of nitric oxide and nitrous oxide~~  
996 ~~emissions from soils, *BioScience* 50 (8): 667-680.~~



- 997 [Degelmann, D. M., Borcken, W., Drake, H. L., Kolb, S. \(2010\). Different Atmospheric](#)  
 998 [Methane-Oxidizing Communities in European Beech and Norway Spruce Soils. Applied](#)  
 999 [and Environmental Microbiology 76 \(10\): 3228-3235.](#)
- 1000 Environment Agency (2011). Determination of thiocyanate by alkaline extraction of soil  
 1001 samples followed by spectrophotometric determination using chloramine-T-isonicotinic  
 1002 acid and 1,3-dimethylbarbituric acid. Leicestershire, United Kingdom, 1-60pp.  
 1003 (www.environment-agency.gov.uk/nls).
- 1004 Erb, T. J., 2011. Carboxylases in Natural and Synthetic Microbial Pathways. Applied and  
 1005 Environmental Microbiology 77 (24), 8466-8477, doi: 10.1128/AEM.05702-11.
- 1006 Eyice, O., Namura, M., Chen, Y., Mead, A., Samavedam, S., & Schäfer, H. (2015). SIP  
 1007 metagenomics identifies uncultivated Methylophilaceae as dimethylsulfide degrading  
 1008 bacteria in soil and lake sediment. ISME J 9: 2336-2348.
- 1009 Flöck, O. R., Andreae, M. O., & Dräger, M. (1997). Environmentally relevant precursors of  
 1010 carbonyl sulfide in aquatic systems. Mar Chem 59, 71-85.
- 1011 Gödde, M., & Conrad, R. (1998). Simultaneous measurement of nitric oxide production and  
 1012 consumption in soil using a simple static incubation system, and the effect of soil water  
 1013 content on the contribution of nitrification. Soil Biol. Biochem. 30, 433-442,  
 1014 doi:10.1016/S0038-0717(97)00197-1.
- 1015 ~~Haritos, V. S., G. Dojchinov (2005). Carbonic anhydrase metabolism is a key factor in~~  
 1016 ~~toxicity of CO<sub>2</sub> and COS but not CS<sub>2</sub> towards the flour beetle Tribolium castaneum~~  
 1017 ~~[Coleoptera: Tenebrionidae]. Comparative Biochemistry and Physiology Part C 140, 139-~~  
 1018 ~~147, doi: 10.1016/j.cca.2005.01.012.~~
- 1019 Inman, R. E., & Ingersoll, R. B. (1971). Note on the uptake of carbon monoxide by soil fungi.  
 1020 J. Air Pollut. Control Assoc. 21: 646-647.
- 1021 Jones, R. D., & Morita, R. Y. (1983). Effects of various parameters on carbon monoxide  
 1022 oxidation by ammonium oxidizers. Can. J. Microbiol. 30, 894-899.
- 1023 Jones, R. D., Morita, R. Y., & Griffiths, R. P. (1984). Method for estimating in situ  
 1024 chemolithotrophic ammonium oxidation using carbon monoxide oxidation. Mar. Ecol. Prog.  
 1025 Ser. 17, 259-269.
- 1026 [Kaisermann, A., Ogée, J., Sauze, J., Wohl, S., Jones, S. P., Gutierrez, A., Wingate, L. \(2018\).](#)  
 1027 [Disentangling the rates of carbonyl sulphide \(COS\) production and consumption and their](#)  
 1028 [dependency with soil properties across biomes and land use types. Atmos. Chem. Phys. 18:](#)  
 1029 [9425-9440.](#)
- 1030 Kamezaki, K., Hattori, S., Ogawa, T., Toyoda, S., Kato, H., Katayama, Y., & Yoshida, N.  
 1031 (2016). Sulfur Isotopic Fractionation of Carbonyl Sulfide during Degradation by Soil  
 1032 Bacteria. Environ. Sci. Technol. 50, 3537-3544, doi: 10.1021/acs.est.5b05325.
- 1033 Katayama, Y., Narahara, Y., Inoue, Y., Amano, F., Kanagawa, T., & Kuriishi (1992). A  
 1034 thiocyanate hydrolase of *Thiobacillus thioparus*: a novel enzyme catalyzing the formation of  
 1035 carbonyl sulfide from thiocyanate. J. Biol. Chem. 267, 9170-9175.
- 1036 Kato, H., Saito, M., Nagahata, Y., & Katayama, Y. (2008). Degradation of ambient carbonyl  
 1037 sulfide by Mycobacterium spp. in soil. Microbiology 154, 249-255.
- 1038 Kelly, D. P., Malin, G., & Wood, A. P. (1993). Microbial transformations and biogeochemical  
 1039 cycling of one-carbon substrates containing Sulphur, nitrogen or halogens, in: Microbial  
 1040 Growth on C1 Compounds (J. C. Murrell and D. P. Kelly, eds.) Intercept, Andover, Mass.,  
 1041 pp. 47-63.
- 1042 Kesselmeier, J., Teusch, N., & Kuhn, U. (1999). Controlling variables for the uptake of  
 1043 atmospheric carbonyl sulfide by soil. J. Geophys. Res. 104 (D9), 11577-11584.
- 1044 King, G. M., Weber, C. F. (2007). Distribution, diversity and ecology of aerobic CO-  
 1045 oxidizing bacteria. Nature Reviews Microbiology 5: 107-118.

1046 Klindworth, A., Pruesse, E., Schweer, T., Peplles, J., Quast, C., Horn, M., & Glöckner, F.O.  
1047 (2013) Evaluation of general 16S ribosomal RNA gene PCR primers for classical and next-  
1048 generation sequencing-based diversity studies. *Nucleic Acids Research*, 41(1):1-11.

1049 Kõljalg, U., Larsson, K. H., Abarenkov, K., Nilsson, R. H., Alexander, I. J., Eberhardt, U.,  
1050 Erland, S., Høiland, K., Kjølter, R., Larsson, E., Pennanen, T., Sen, R., Taylor, A. F.,  
1051 Tedersoo, L., Vrålstad, T., & Ursing, B. M. (2005). UNITE: a database providing web-  
1052 based methods for the molecular identification of ectomycorrhizal fungi. *New Phytologists*  
1053 166 (3): 1063-1068.

1054 [Kooijmans, L. M. J., Uitslag, N. A. M., Zahniser, M. S., Nelson, D. D., Montzka, S. A., Chen,  
1055 H. \(2016\). Continuous and high-precision atmospheric concentration measurements of  
1056 COS, CO<sub>2</sub>, CO and H<sub>2</sub>O using a quantum cascade laser spectrometer \(QCLS\). \*Atmospheric  
1057 Measurement Techniques\* 9: 5293-5314, doi: 10.5194/amt-9-5293-2016.](#)

1058 Könneke, M., Schubert, D. M., Brown, P. C., Hügler, M., Standfest, S., Schwander, T.,  
1059 Schada von Borzyskowski, L., Erb, T. J., Stahl, D. A., Berg, I. A., (2014). Ammonia-  
1060 oxidizing archaea use the most energy-efficient aerobic pathway for CO<sub>2</sub> fixation. *PNAS*  
1061 111 (22): 8239-8244, doi: 10.1073/pnas.1402028111.

1062 Krämer, M., Baumgärtner, M., Bender, M., Conrad, R. (1990). Consumption of NO by  
1063 methanotrophic bacteria in pure culture and in soil. *FEMS Microbiology Ecology* 73: 345-  
1064 350.

1065 Kuhn, U. and Kesselmeier, J. (2000) Environmental variables controlling the uptake of  
1066 carbonyl sulfide by lichens. *J. Geophys. Res.* 105 (22), 26783-26792.

1067 Laing, W. A., & Christeller, J. T., (1980). A Steady-State Kinetic Study on the Catalytic  
1068 Mechanism of Ribulose Biphosphate Carboxylase from Soybean. *Archives of Biochemistry  
1069 and Biophysics* 202 (2): 592-600.

1070 Lehmann, S., & Conrad, R., (1996). Characteristics of Turnover of Carbonyl Sulfide in Four  
1071 Different Soils. *Journal of Atmospheric Chemistry* 23: 193-207.

1072 Lorimer, G. H., & Pierce, J., (1989). Carbonyl Sulfide: An Alternate Substrate for but Not an  
1073 Activator of Ribulose-1,5-biphosphate Carboxylase. *The Journal of Biological Chemistry*  
1074 264 (5): 2764-2772.

1075 ~~[Ma, A., Zhuang, X., Wu, J., Cui, M., Lv, D., Liu, C., and Zhuang, G. \(2013\). Ascomycota  
1076 Members Dominate Fungal Communities during Straw Residue Decomposition in Arable  
1077 Soil. \*PLoS One\* 8 \(6\): e66146, doi: 10.1371/journal.pone.0066146.](#)~~

1078 Masaki, Y., Ozawa, R., Kageyama, K., & Katayama, Y. (2016). Degradation and emission of  
1079 carbonyl sulfide, an atmospheric trace gas, by fungi isolated from forest soil. *FEMS  
1080 Microbiology Letters* 363 (18), doi: 10.1093/femsle/fnw197.

1081 Maseyk, K., J. A. Berry, D. Billesbach, J. E. Campell, M. S. Torn, M. Zahniser, and U. Seibt.  
1082 (2014), Sources and sinks of carbonyl sulfide in an agricultural field in the southern great  
1083 planes, *PNAS*, 111, no. 25, 9064–9069, doi: 10.1073/pnas.1319132111

1084 Mason, F., Harper, D., & Larkin, M. (1994). The microbial degradation of thiocyanate.  
1085 *Biochemical Society Transactions* 22: 423.

1086 McDonald, D., Price, M.N., Goodrich, J., Nawrocki, E. P., DeSantis, T. Z., Probst, A.,  
1087 Andersen, G. L., Knight, R., & Hugenholtz, P. (2012). An improved Greengenes taxonomy  
1088 with explicit ranks for ecological and evolutionary analyses of bacteria and archaea. *ISME J*  
1089 6 (3): 610-618.

1090 [Mellillo, J. M., Steudler, P. A. \(1989\). The effect of nitrogen fertilization on the COS and CS<sub>2</sub>  
1091 emissions from temperate forest soils. \*Journal of Atmospheric Chemistry\* 9 \(4\): 411-417.](#)

1092 [Meredith, L. K., Boye, K., Youngerman, C., Whelan, M., Ogée, J., Sauze, J., and Wingate, L.  
1093 \(2018<sup>a</sup>\). Coupled Biological and Abiotic Mechanisms Driving Carbonyl Sulfide Production  
1094 in Soils. \*Soil Systems\* 2 \(3\): 37, doi:10.3390/soilsystems2030037.](#)

1095 [Meredith, L. K., Ogée, J., Boye, K., Singer, E., Wingate, L., von Sperber, C., Sengupta, A.,  
1096 Whelan, M., Pang, E., Keiluweit, M., Brüggemann, N., Berry, J. A., Welander, P. V.](#)

- 1097 | [\(2018<sup>b</sup>\). Soil exchange rates of COS and CO<sup>18</sup>O differ with the diversity of microbial](#)  
1098 | [communities and their carbonic anhydrase enzymes. ISME Journal 2018 Sep 13, doi:](#)  
1099 | [10.1038/s41396-018-0270-2.](#)
- 1100 Michalski, G., Böhlke, J. K., and Thiemens, M. (2004). Long term atmospheric deposition as  
1101 the source of nitrate and other salts in the Atacama Desert, Chile: New evidence from mass-  
1102 independent oxygen isotopic compositions. *Geochimica et Cosmochimica Acta* 68 (20):  
1103 4023-4038.
- 1104 Morgulis A., Coulouris G., Raytselis Y., Madden T.L., Agarwala R., & Schäffer A.A. (2008).  
1105 "Database indexing for production MegaBLAST searches." *Bioinformatics* 15: 1757-1764.
- 1106 Moxley, J. M., & Smith, K. A. (1998). Factors affecting utilization of atmospheric CO by  
1107 soils. *Soil Biology and Biochemistry* 30 (1), 65-79.
- 1108 Muyzer, G., & Stams, A. J. M. (2008). The ecology and biotechnology of sulphate-reducing  
1109 bacteria. *Nature Reviews Microbiology* 6: 441-454.
- 1110 Notni, J., Schenk, S., Protoschill-Krebs, G., Kesselmeier, J., and Anders, E. (2007) The  
1111 missing link in COS metabolism: A model study on the reactivation of carbonic anhydrase  
1112 from its hydrosulfide analogue. *ChemBioChem*, 8, 530 – 536
- 1113 Ogawa, T., Noguchi, K., Saito, M., Nagahata, Y., Kato, H., Ohtaki, A., Nakayama, H.,  
1114 Dohmae, N., Matsushita, Y., Odaka, M., Yohda, M., Nyunoya, H., & Katayama, Y. (2013).  
1115 Carbonyl Sulfide Hydrolase from *Thiobacillus thioparus* Strain THI114 is one of the  $\beta$ -  
1116 carbonic Anhydrase Family Enzymes. *J. Am. Chem. Soc.* 135, 3818-3825.
- 1117 Ogawa, T., Kato, H., Higashide, M., Nishimiya, M., & Katayama, Y. (2016). Degradation of  
1118 carbonyl sulfide by Actinomycetes and detection of clade D of  $\beta$ -class carbonic anhydrase.  
1119 *FEMS Microbiology Letters* 363 (19), doi: 10.1093/femsle/fnw223.
- 1120 Ogée, J., Sauze, J., Kesselmeier, J., Genty, B., Van Diest, H., Launois, T., & Wingate, L.  
1121 (2016). A new mechanistic framework to predict OCS fluxes from soils. *Biogeosciences* 13,  
1122 2221-2240, doi: 10.5194/bg-13-2221-2016.
- 1123 Oswald, R., Behrendt, T., Ermel, M., Wu, D., Su, H., Cheng, Y., Breuninger, C., Moravek,  
1124 A., Mougín, E., Delon, C., Loubet, B., Pommerening-Röser, A., Sörgel, M., Pöschl, U.,  
1125 Hoffmann, T., Andreae, M. O., Meixner, F. X., & Trebs, I. (2013). HONO emissions from  
1126 soil bacteria as a major source of atmospheric reactive nitrogen, *Science* 341, 1233-1235.
- 1127 Placella, S. A., & Firestone, M. K. (2013). Transcriptional Response of Nitrifying  
1128 Communities to Wetting of Dry soil. *Appl. Environ. Microbiol.* 79, 3294-3302.
- 1129 Pratscher, J., Dumont, M. G., & Conrad, R. (2011). Ammonia-oxidation coupled to CO<sub>2</sub>  
1130 fixation by archaea and bacteria in an agricultural soil. *PNAS* 108 (10), 4170-4175.
- 1131 Protoschill-Krebs, G. & Kesselmeier, J. (1992). Enzymatic pathways for the consumption of  
1132 carbonyl sulphide (COS) by higher plants. *Botanica Acta* 105, 206-212.
- 1133 Protoschill-Krebs, G., Wilhelm, C., & Kesselmeier, J. (1995). Consumption of carbonyl  
1134 sulfide by *Chlamydomonas reinhardtii* with different activities of carbonic anhydrase (CA)  
1135 induced by different CO<sub>2</sub> growing regimes. *Bot Acta* 108, 445-448.
- 1136 Protoschill-Krebs, G., Wilhelm, C. & Kesselmeier, J. (1996). Consumption of carbonyl  
1137 sulphide by carbonic anhydrase (CA) isolated from *Pisum sativum*. *Atmospheric*  
1138 *Environment* 30, 3151-3156.
- 1139 Ragsdale, S. W. (2004). Life with carbon monoxide. *Crit. Rev. Biochem. Mol. Biol.* 39. 165-  
1140 195.
- 1141 Rasigraf, O., Kool, D. M., Jetten, M. S. M., Sinninghe Damsté, J. S., Ettwig, K. F., (2014).  
1142 Autotrophic Carbon Dioxide Fixation via the Calvin-Benson-Bassham Cycle by the  
1143 Denitrifying Methanotroph "Candidatus *Methylophilus oxyfera*". *Appl Environ*  
1144 *Microbiol* 80, 2451-2460.
- 1145 Ren, T., Roy, R., Knowles, R. (2000). Production and Consumption of Nitric Oxide by Three  
1146 Methanotrophic Bacteria. *Applied and Environmental Microbiology* 66: 3891-3897.

1147 Rotthauwe, J. H., Witzel, K. P., Liesack, W. (1997). The ammonia monooxygenase structural  
1148 gene amoA as a functional marker: molecular fine-scale analysis of natural ammonia-  
1149 oxidizing populations. *Applied and Environmental Microbiology* 63, 4704-4712.

1150 Sander, R. (2015). Compilation of Henry's law constants (version 4.0) for water as solvent,  
1151 *Atmos. Chem. Phys.* 15, 4399-4981, doi: 10.5194/acp-15-4399-2015.

1152 Sandoval-Soto, L., Stanimirov, M., Von Hobe, M., Schmitt, V., Valdes, J., Wild, A., &  
1153 Kesselmeier, J. (2005). Global uptake of carbonyl sulfide (COS) by terrestrial vegetation:  
1154 Estimates corrected by deposition velocities normalized to the uptake of carbon dioxide  
1155 (CO<sub>2</sub>). *Biogeosciences* 2, 125-132.

1156 Sandoval-Soto, L., Kesselmeier, M., Schmitt, V., Wild, A. & Kesselmeier, J. (2012).  
1157 Observations of the uptake of Carbonyl sulfide (COS) by trees under elevated atmospheric  
1158 carbon dioxide concentrations. *Biogeosciences*, 9, 2935–2945.

1159 Sauze, J., Ogeé, J., Maron, P.-A., Crouzet, O., Nowak, V., Wohl, S., Kaisermann, A., Jones,  
1160 S. P., and Wingate, L. (2017). The interaction of soil phototrophs and fungi with pH and  
1161 their impact on soil CO<sub>2</sub>, CO<sup>18</sup>O and OCS exchange. *Soil Biology and Biochemistry* 115  
1162 (Supplement C), 371-382, doi: 10.1016/j.soilbio.2017.09.009.

1163 Schmieder R., & Edwards R. (2011): Quality control and preprocessing of metagenomic  
1164 datasets. *Bioinformatics* 27: 863-864.

1165 Selesi, D., Pattis, I., Schmid, M., Kandeler, E., & Hartmann, A. (2007). Quantification of  
1166 bacterial RubisCO genes in soils by cbbL targeted real-time PCR. *Journal of*  
1167 *Microbiological Methods* 69, 497-503.

1168 Selesi, D., Schmid, M., & Hartmann, A. (2005). Diversity of green-like and red-like ribulose-  
1169 1,5-biphosphate carboxylase/oxygenase large-subunit genes (*cbbL*) in differently managed  
1170 agricultural soils. *Appl. Environ. Microbiol.* 71:175-184.

1171 Smeulders, M. J., Barends, T. R. M., Pol, A., Scherer, A., Zandvoort, M. H., Udvarhelyi, A.,  
1172 Khadem, A. F., Menzel, A., Hermans, J., Shoeman, R. L., Wessels., H. J. C. T., van den  
1173 Heuvel, L. P., Russ, L., Schlichting, I., Jetten, M. S. M., Op den Camp, H. J. M., (2011).  
1174 Evolution of a new enzyme for carbon disulphide conversion by an acidothermophilic  
1175 archaeon. *Nature* 478, 412-416.

1176 Smith, N. A., & Kelly, P. (1988). Oxidation of carbon disulphide as the sole source of energy  
1177 for the autotrophic growth of *Thiobacillus thioporus* strain TK-m. *Journal of General*  
1178 *Microbiology* 134, 3041-3048.

1179 ~~Smith, K.S., Jakubzik, C., Whittam, T.S., Ferry, J.G. (1999). Carbonic anhydrase is an~~  
1180 ~~ancient enzyme widespread in prokaryotes. *Proceedings of the National Academy of*~~  
1181 ~~*Sciences* 96, 15184–15189.~~

1182 Sokolova, T. G., Yakimov, M. M., Chernyh, N. A., Yu, E. Lun'kova, Kostrikina, N. A.,  
1183 Taranov, E. A., Lebedinskii, A. V., Bonch-Osmolovskaya, E. A. (2017). Aerobic Carbon  
1184 Monoxide Oxidation in the Course of Growth of a Hyperthermophilic Archaeon, *Sulfolobus*  
1185 sp. ETSY. *Microbiology* 86 (5): 539-548.

1186 Sorokin, D.Y., Tourova, T.P., Bezoudnova, E.Y., Pol, A., & Muyzer, G. (2007).  
1187 Denitrification in a binary culture and thiocyanate metabolism in *Thiohalophilus*  
1188 *thiocyanoxidans* gen. nov. sp. nov. – a moderately halophilic chemolithoautotrophic sulfur-  
1189 oxidizing *Gammaproteobacterium* from hypersaline lakes. *Archives in Microbiology*, 187:  
1190 441-450.

1191 Sorokin, D.Y., Tourova, T.P., Lysenko, A.M., & Muyzer, G. (2006). Diversity of culturable  
1192 halophilic sulfur-oxidizing bacteria in hypersaline habitats. *Microbiology*, 152: 3013-23.

1193 Sun, W., Kooijmans, L. M. J., Maseyk, K., Chen, H., Mammarella, I., Vesala, T., Levula, J.,  
1194 Keskinen, H., & Seibt, U. (2017). Soil fluxes of carbonyl sulfide (COS), carbon monoxide,  
1195 and carbon dioxide in a boreal forest in southern Finland. *Atmos. Chem. Phys. Discuss.*,  
1196 doi: 10.5194/acp-2017-180.



1197 Tedersoo, L., May, T. W., & Smith, M. E. (2010). Ectomycorrhizal lifestyle in fungi: global  
1198 diversity, distribution and evolution of phylogenetic lineages. *Mycorrhiza* 20: 217-263.

1199 Tourna, M., Freitag, T. E., Nicol, G. W., Prosser, J. I. (2008). Growth, activity and  
1200 temperature response of ammonia-oxidizing archaea and bacteria in soil microcosms.  
1201 *Environmental Microbiology* 10: 1357-1364.

1202 Van Diest, H., & Kesselmeier, J. (2008). Soil atmosphere exchange of carbonyl sulfide (OCS)  
1203 regulated by diffusivity depending on water filled pore space. *Biogeosciences* 5, 475-483.

1204 Warneck, P., & Williams, J. (2012). *The Atmospheric Chemist's Companion. Numerical Data*  
1205 *for Use in the Atmospheric Sciences*. Springer, Heidelberg, pp. 1-436.

1206 Watts, S. F. (2000). The mass budgets of carbonyl sulfide, dimethyl sulfide, carbon disulfide  
1207 and hydrogen sulfide. *Atmospheric Environment* 34, 761-779.

1208 Whelan, M. E., Hilton, T. W., Berry, J. A., Berkelhammer, M., Desai, A. R., & Campbell, J.  
1209 E. (2016). Carbonyl sulfide exchange in soils for better estimates of ecosystem carbon  
1210 uptake. *Atmos. Chem. Phys.* 16, 3711-3726, doi: 10.5194/acp-16-3711-2016.

1211 Whelan, M. E. & Rhew, R. C. (2015). Carbonyl sulfide produced by abiotic thermal and  
1212 photodegradation of soil organic matter from wheat field substrate, *J. Geophys. Res.*  
1213 *Biogeosci.* 120, 54-62, doi: 10.1002/2014JG002661.

1214 Whelan, M. E., Lennartz, S. T., Gimeno, T. E., Wehr, R., Wohlfahrt, G., Wang, Y.,  
1215 Kooijmans, L. M., J., Hilton, T. W., Belviso, S., Peylin, P., Commane, R., Sun, W., Chen,  
1216 H., Kuai, L., Mammarella, I., Maseyk, K., Berkelhammer, M., Li, K.-F., Yakir, D.,  
1217 Zumkehr, A., Katayama, Y., Ogée, J., Spielmann, F. M., Kitz, F., Rastogi, B., Kesselmeier,  
1218 J., Marshall, J., Erkkilä, K.-M., Wingate, L., Meredith, L. K., He, W., Bunk, R., Launois, T.,  
1219 Vesala, T., Schmidt, J. A., Fichot, C. G., Seibt, U., Saleska, S., Saltzman, E. S., Montzka, S.  
1220 A., Berry, J. A., Campbell, J. E., (2017). Reviews and Syntheses: Carbonyl Sulfide as a  
1221 Multi-scale Tracer for Carbon and Water Cycles. *Biogeosciences Discuss.*,  
1222 <https://doi.org/10.5194/bg-2017-427>.

1223 White T.J., Bruns T.D., Lee S.B. & Taylor J.W. (1990). Amplification and direct sequencing  
1224 of fungal ribosomal RNA genes for phylogenetics. In: Innis M.A., Gelfand D.H., Sninsky  
1225 J.J. & White T.J. (eds.). *PCR protocols: a guide to methods and applications*. United States:  
1226 Academic Press. pp. 315–322.

1227 ~~Wierzchos, J., Cámara, B., De Los Ríos, A., Davila, A. F., Sánchez Almazo, I. M., Artieda,~~  
1228 ~~O., Wierzchos, K., Gómez Silva, B., McKay, C., & Ascaso, C. (2011). Microbial~~  
1229 ~~colonization of Ca-sulfate crusts in the hyperarid core of the Atacama Desert: implications~~  
1230 ~~for the search for life on Mars. *Geobiology* 9, 44-60, doi: 10.1111/j.1472-~~  
1231 ~~4669.2010.00254.x.~~

1232 Wingate, L., Ogée, J., Cuntz, M., Genty, B., Reiter, I., Seibt, U., Yakir, D., Maseyk, K.,  
1233 Pendall, E. G., Barbour, M. M., Mortazavi, B., Burlett, R., Peylin, P., Miller, J., Mencucciini,  
1234 M., Shim, J. H., Hunt, J., Grace, J., 2009. The impact of soil organisms on the global budget  
1235 of  $\delta^{18}\text{O}$  in atmospheric  $\text{CO}_2$ . *PNAS* 106, 52, 22411-22415. doi:10.1073\_pnas.0905210106.

1236 Zhang, Q., Wang, D., Li, M., Xiang, W. & Achal, V. (2014). Isolation and characterization of  
1237 diesel degrading bacteria, *Sphingomonas sp.* and *Acinetobacter hunii* from petroleum  
1238 contaminated soil. *Frontiers of Earth Science* 8 (1): 58-63.

1239 Zhang, J., Kobert, K., Flouri, T., Stamatakis, A. (2014). PEAR: a fasta and accurate Illumina  
1240 Paired-End reAd mergeR. *Bioinformatics* 30 (5): 614-620.

1241 Žiřčáková, L., Větrovský, T., Howe, A., Baldrian, P. (2016): Microbial activity in forest soil  
1242 reflects the changes in ecosystem properties between summer and winter. *Environmental*  
1243 *Microbiology* 18 (1): 288-301, doi: 10.1111/1462-2920.13026.

1244

**Tab. 1** Soil properties and experimental conditions summary of soil samples and experimental conditions used for analysis. Note that NOCS and CO exchange rates were measured only for fluxes for F3, F4, F5 and A1, A1dry and F3 soils at 50 ppt and 1000 ppt OCS, respectively. ~~are presented in a separate study including the compensation points (Bunk et al., submitted).~~ Temperature for all experiments was 25°C.

| Soil ID                                                           | Location           | Coordinates             | Vegetation cover      | OCS [pmol-g h <sup>-1</sup> ] | CO [pmol g-h <sup>-1</sup> ] | NO [pmol g-h <sup>-1</sup> ] | pH [H] | S [%] |
|-------------------------------------------------------------------|--------------------|-------------------------|-----------------------|-------------------------------|------------------------------|------------------------------|--------|-------|
| <i>50 ppt OCS, zero air    400 ppm CO<sub>2</sub>, ambient</i>    |                    |                         |                       |                               |                              |                              |        |       |
| A1                                                                | Mainz, GER         | (49.951°N/<br>08.250°E) | Corn                  | +                             | +                            | +                            | 7.6*   | 0.03* |
| <i>500 ppt OCS 'ambient'    400 ppm CO<sub>2</sub>, ambient</i>   |                    |                         |                       |                               |                              |                              |        |       |
| D1                                                                | Bahariyya, EGP     | (28.362°N/<br>28.860°E) | -                     | +                             | -                            | -                            | 8.3    | 0.13  |
| D2                                                                | Waxxari, CHI       | (38.705°N/<br>87.414°E) | -                     | +                             | -                            | -                            | 8.3    | 3.74  |
| F1                                                                | Canarana, BRA      | (13.077°S/<br>52.377°W) | rainforest<br>natural | +                             | -                            | -                            | 4.6    | 0.02  |
| F2                                                                | Canarana, BRA      | (13.079°S/<br>52.386°W) | rainforest<br>burned  | +                             | -                            | -                            | 4.5    | n.d.  |
| A1                                                                |                    |                         |                       | +                             | +                            | +                            |        |       |
| A2                                                                | Baldingen, GER     | (48.865°N/<br>10.462°E) | corn                  | +                             | -                            | -                            | 7.1*   | 0.03* |
| A3                                                                | Baldingen, GER     | (48.866°N/<br>10.866°E) | sugarbeet             | +                             | -                            | -                            | 7.2*   | 0.04* |
| A4                                                                | Baldingen, GER     | (48.867°N/<br>10.467°E) | wheat                 | +                             | -                            | -                            | 7.7    | 0.03  |
| A5                                                                | Hawkesbury,<br>AUS | (33.570°S/<br>150.77°E) | grass                 | +                             | -                            | -                            | 5.4    | 0.03  |
| <i>1000 ppt OCS 'elevated'    400 ppm CO<sub>2</sub>, ambient</i> |                    |                         |                       |                               |                              |                              |        |       |
| A1                                                                |                    |                         |                       | +                             | +                            | +                            |        |       |

\* data adopted from Bunk et al., 2017, \*\* data adopted from Behrendt et al., 2014, n. d. not determined.

| Soil ID                                                             | Location                 | Coordinates             | Vegetation cover      | CO/NO**<br>[pmol g h <sup>-1</sup> ] | Inc. time<br>[h] | NH <sub>4</sub><br>[mg kg <sup>-1</sup> ] | NO <sub>3</sub><br>[mg kg <sup>-1</sup> ] | pH    | S<br>[%] |
|---------------------------------------------------------------------|--------------------------|-------------------------|-----------------------|--------------------------------------|------------------|-------------------------------------------|-------------------------------------------|-------|----------|
| <i>500 ppt OCS 'ambient' &amp; 400 ppm CO<sub>2</sub>, ambient'</i> |                          |                         |                       |                                      |                  |                                           |                                           |       |          |
| D1                                                                  | Bahariyya,<br>Egypt      | (28.362°N/<br>28.860°E) | -                     | -                                    | 22               | 3.7                                       | 37.7                                      | 8.3   | 0.13     |
| D2                                                                  | Waxxari,<br>China        | (38.705°N/<br>87.414°E) | -                     | -                                    | 25               | <1.0                                      | 325.0                                     | 8.3   | 3.74     |
| F1                                                                  | Canarana,<br>Brazil      | (13.077°S/<br>52.377°W) | rainforest<br>natural | -                                    | 64.6             | 54.1                                      | 10.4                                      | 4.6   | 0.02     |
| F2                                                                  | Canarana,<br>Brazil      | (13.079°S/<br>52.386°W) | rainforest<br>burned  | -                                    | 29               | 18.3                                      | 7.4                                       | 4.5   | n.d.     |
| A1                                                                  | Mainz,<br>Germany        | (49.951°N/<br>08.250°E) | corn                  | -                                    | 71               | <0.05*                                    | 3.78*                                     | 7.6*  | 0.03*    |
| A2                                                                  | Baldingen,<br>Germany    | (48.865°N/<br>10.462°E) | corn                  | -                                    | 71               | <0.1*                                     | 86.0*                                     | 7.1*  | 0.03*    |
| A3                                                                  | Baldingen,<br>Germany    | (48.866°N/<br>10.866°E) | sugarbeet             | -                                    | 71               | 1.6*                                      | 75.6*                                     | 7.2*  | 0.04*    |
| A4                                                                  | Baldingen,<br>Germany    | (48.867°N/<br>10.467°E) | wheat                 | -                                    | 50               | 1.9                                       | 29.0                                      | 7.7   | 0.03     |
| A5                                                                  | Hawkesbury,<br>Australia | (33.570°S/<br>150.77°E) | grass                 | -                                    | 38.3             | 2.9**                                     | 17.5**                                    | 5.4** | 0.03     |

| <i>50 ppt OCS, zero air' &amp; 400 ppm CO<sub>2</sub>, ambient'</i> |                      |                         |        |   |      |  |  |  |  |
|---------------------------------------------------------------------|----------------------|-------------------------|--------|---|------|--|--|--|--|
| A1                                                                  | Mainz,<br>Germany    | (49.951°N/<br>08.250°E) | corn   | ± | 96.6 |  |  |  |  |
| A1dry                                                               | Mainz,<br>Germany    | (49.951°N/<br>08.250°E) | corn   | ± | 96.6 |  |  |  |  |
| F3                                                                  | Sparneck,<br>Germany | (50.143°N/<br>11.867°E) | spruce | ± |      |  |  |  |  |

| <i>1000 ppt OCS 'elevated' &amp; 400 ppm CO<sub>2</sub>, ambient'</i> |                      |                         |        |   |      |  |  |  |  |
|-----------------------------------------------------------------------|----------------------|-------------------------|--------|---|------|--|--|--|--|
| A1                                                                    | Mainz,<br>Germany    | (49.951°N/<br>08.250°E) | corn   | ± | 61.4 |  |  |  |  |
| A1dry                                                                 | Mainz,<br>Germany    | (49.951°N/<br>08.250°E) | corn   | ± | 61.3 |  |  |  |  |
| F3                                                                    | Sparneck,<br>Germany | (50.143°N/<br>11.867°E) | spruce | ± |      |  |  |  |  |

Note that OCS fluxes for F3, A1 and A1dry -are presented in Bunk et al., submitted.

\* data adopted from Bunk et al., 2017, \*\*data adopted from Oswald et al., 2013, n. d. not determined.





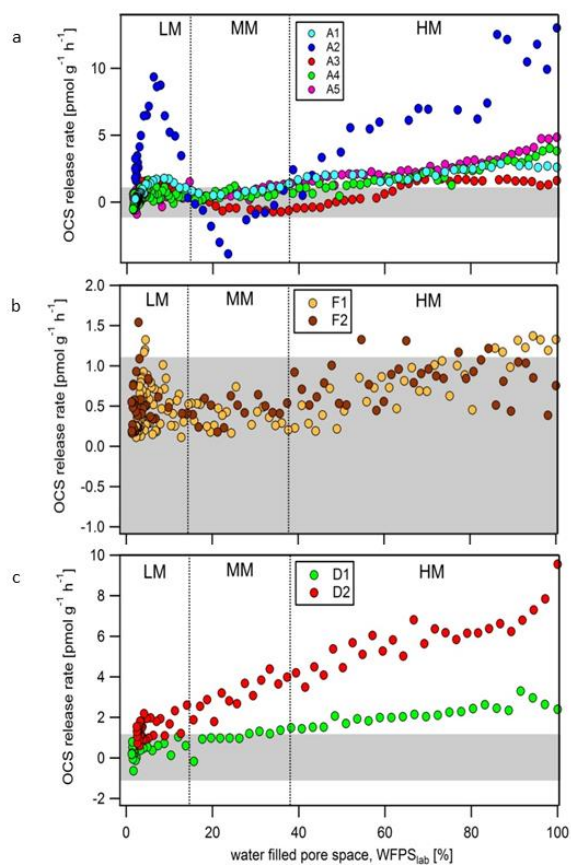

**Fig. 1** OCS exchange rates from soil samples originated from agriculture (a) A1 to A5: cornfield (light blue), cornfield (dark blue), sugar beet (red dots), wheatfield (green), and grassland (pink), (b) F1, F2: natural rainforest (orange) and annual burned rainforest (brown), and (c) D1, D2: sand desert (green) sand desert (red) measured at 500 ppt OCS mixing ratio and 400 ppm CO<sub>2</sub> mixing ratio. Data of A1, A2, A3 are adapted from Bunk et al., submitted. Grey shaded area represents the threshold of -1.09 to 1.09 pmol g<sup>-1</sup> h<sup>-1</sup> where no significant OCS exchange could be detected.

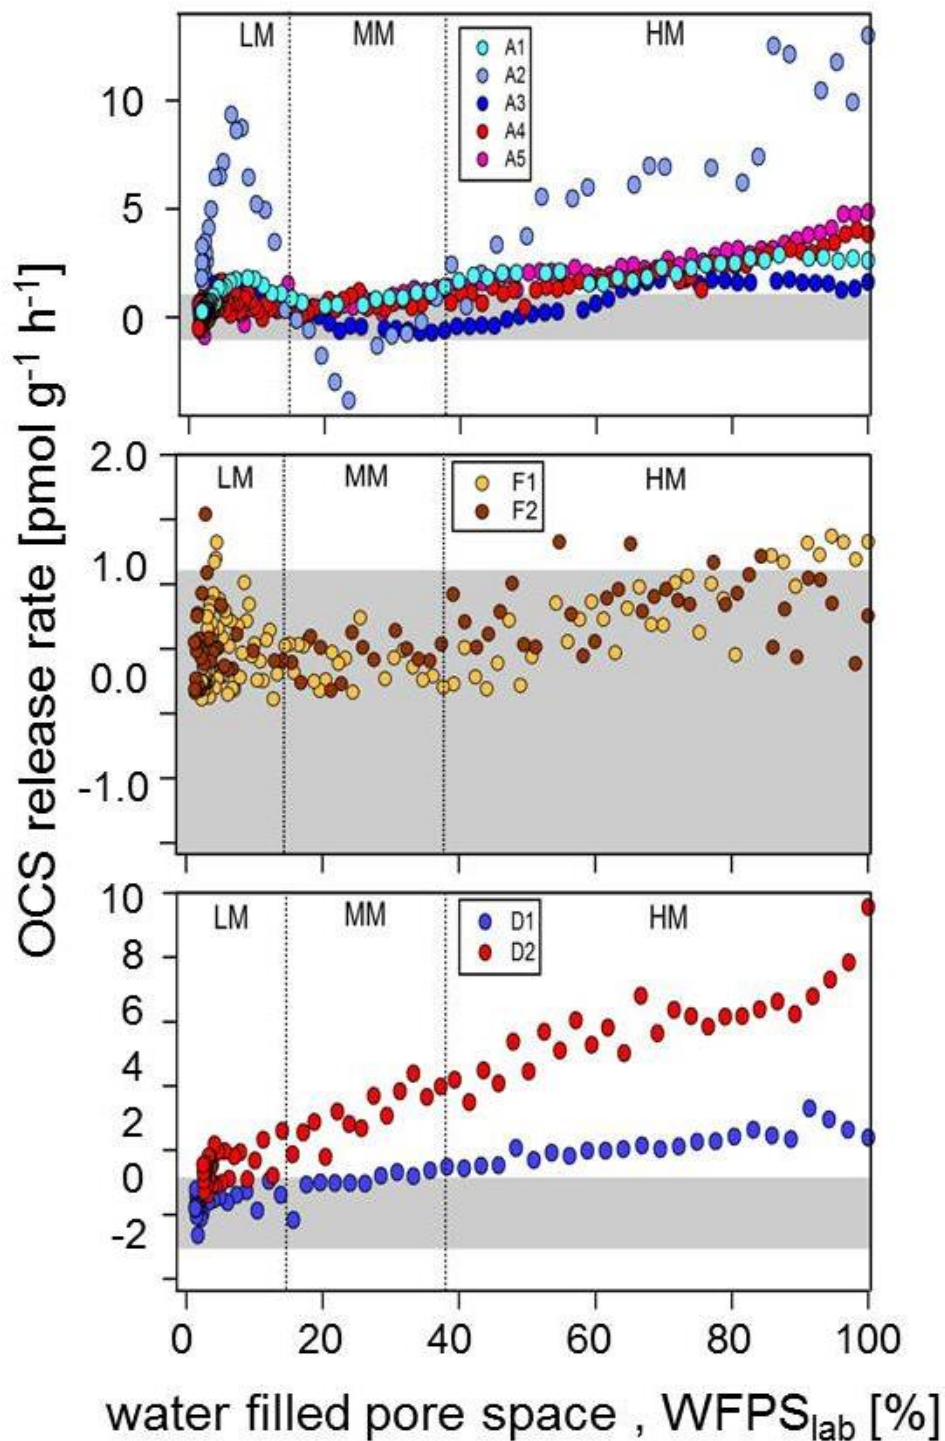

**Figure 1** OCS exchange rates from soil samples originated from agriculture (a) A1 to A5: cornfield (light blue), cornfield (blue), sugar beet (dark blue), wheatfield (red), and grassland (pink), (b) F1, F2: natural rainforest (orange) and annual burned rainforest (brown), and (c) D1, D2: sand desert (blue) sand desert (red) measured at 500 ppt OCS mixing ratio and 400 ppm CO<sub>2</sub> mixing ratio. According to Bunk et al., 2017 OCS release rates are classified into high moisture (HM), moderate moisture (MM) and low moisture (LM) regime. Y-axis has different scales in subfigures. Data of A1, A2, A3 are adapted from Bunk et al., submitted. Grey shaded area represents the threshold of 1.09 to -1.09 pmol g<sup>-1</sup> h<sup>-1</sup> where no significant OCS exchange could be detected.

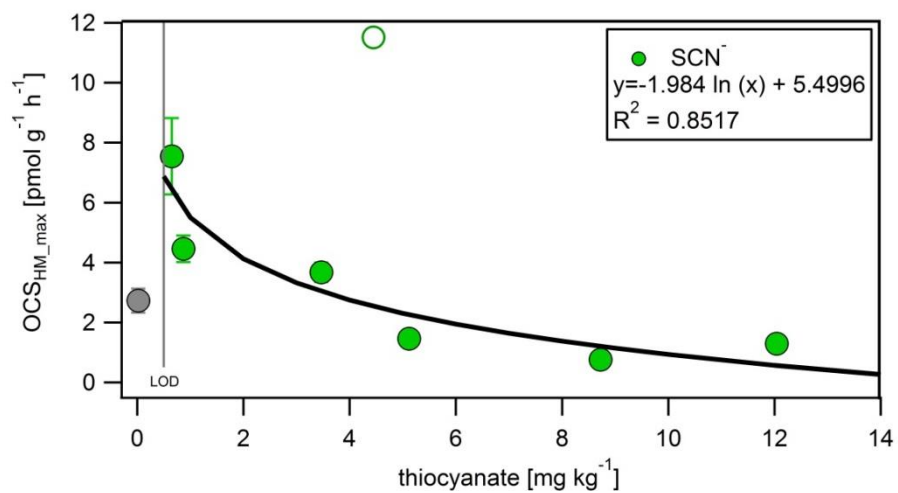

**Fig. 2** Correlation between OCS exchange rate,  $OCS_{\max, HM}$  and thiocyanate ( $SCN^-$ ) at high soil moisture for samples F1, F2, A3, A4, A5 (green). The maximum OCS exchange rate and thiocyanate concentration for A2 (green circle) are considered as an outlier, possibly due to release of thiocyanate from fine roots during the sieving procedure. Thiocyanate was below limit of detection (LOD of  $0.5 \text{ mg kg}^{-1}$ ) for D1 soil (grey).

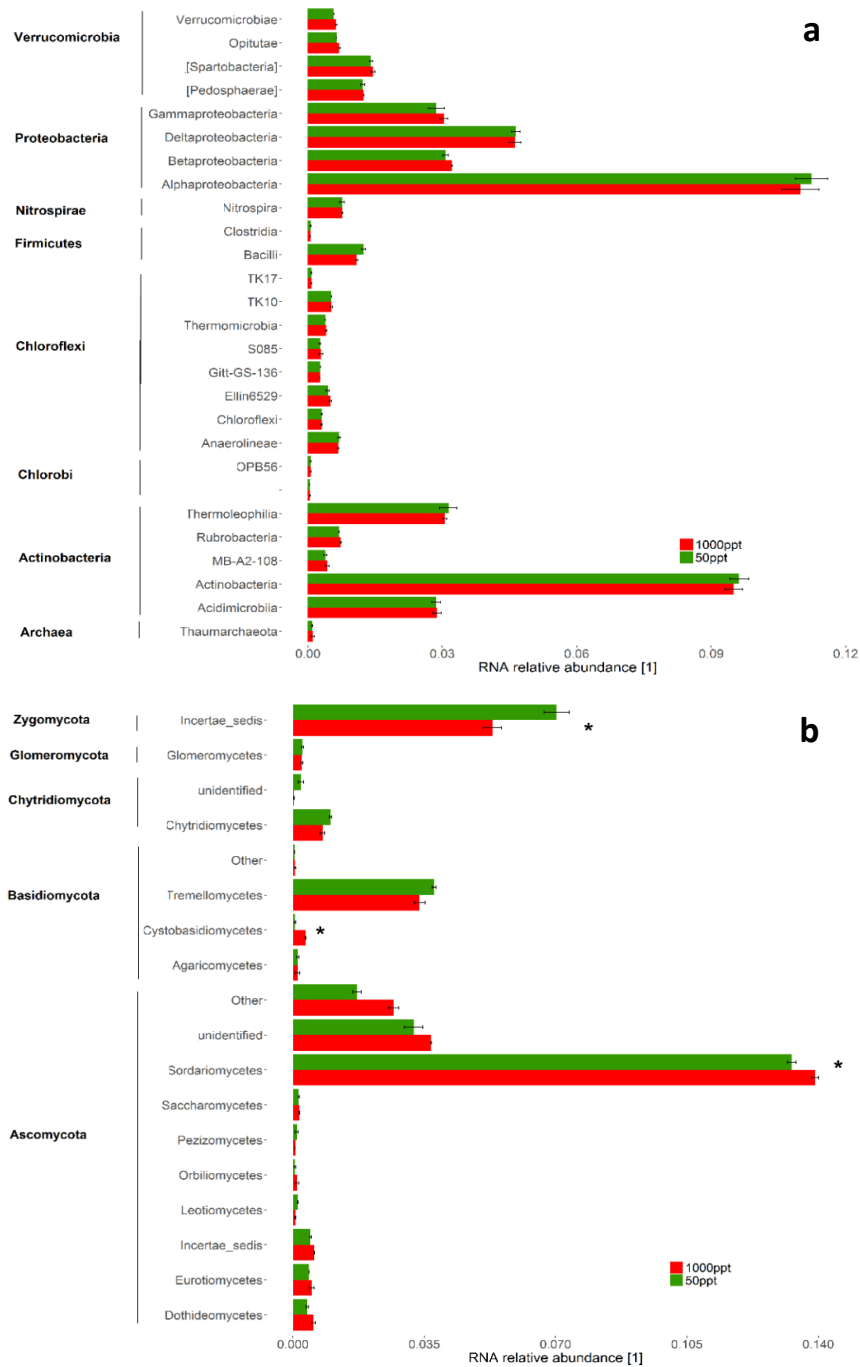

**Fig. 3** Taxonomic composition of the mid-latitude corn field soil Mainz, Germany, at 22 % WFPS<sub>lab</sub> of the samples under 1000 ppt or 50 ppt OCS. Relative abundance of (a) 16S rRNA transcripts for selected bacterial classes and (b) internal transcribed spacer (ITS) transcripts for fungal classes, normalized by the total number of assigned reads per sample. Classes with RNA relative abundance < 5 × 10<sup>-4</sup> did not show significant differences and were not plotted. Error bars represent standard deviation. Asterisks represent statistically different values (p-value < 0.05). Classes named as “unclassified” or “Other” are groups identified by the Qiime pipeline, however with no known classification in the database, under the used threshold of sequence similarity (90 %).

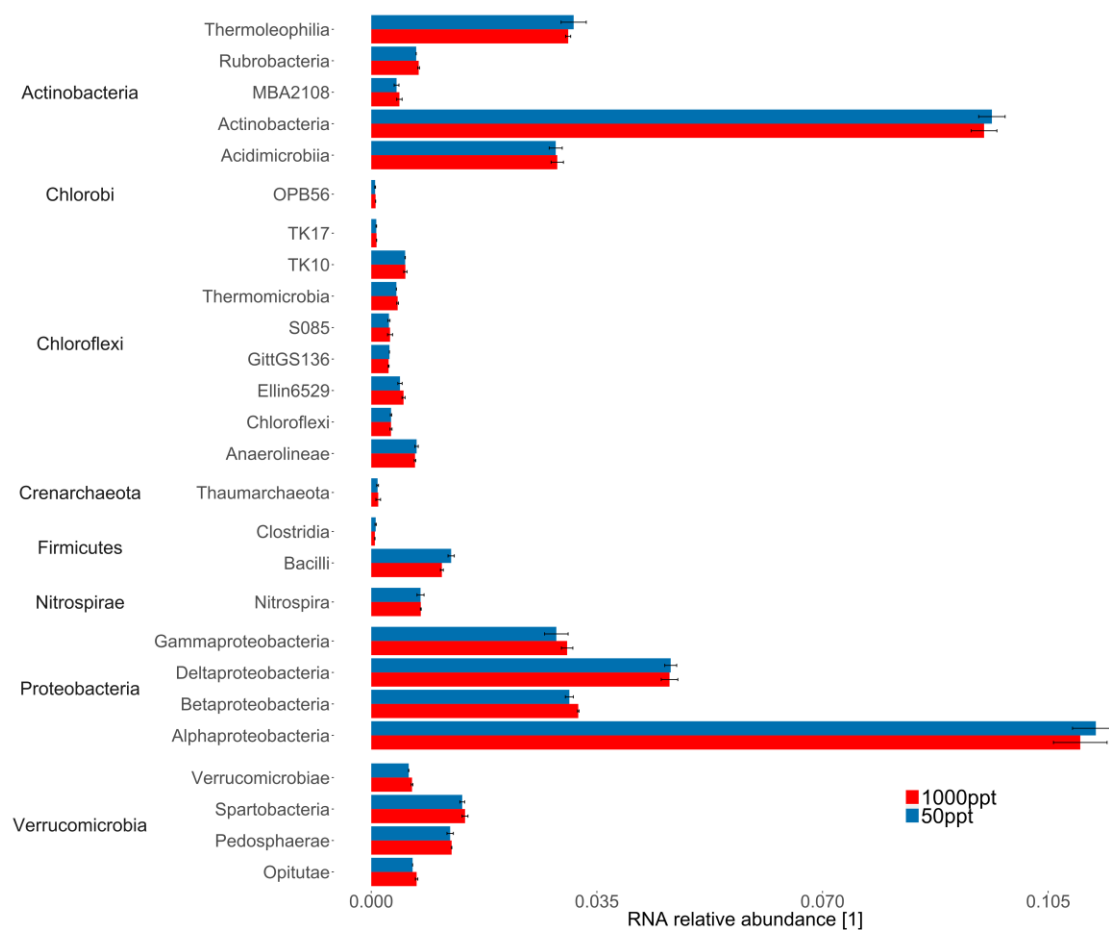

**Figure 3** Taxonomic composition of the mid-latitude corn field soil Mainz, Germany, at 22% WFPS<sub>lab</sub> of the samples under 1000 ppt or 50 ppt OCS. 16S rRNA relative abundance for selected bacterial classes have been normalized by the total number of assigned reads per sample. Classes with RNA relative abundance  $< 5 \times 10^{-4}$  did not show significant differences and were not plotted. Error bars represent standard deviation. Asterisks represent statistically different values (p-value  $< 0.05$ ).

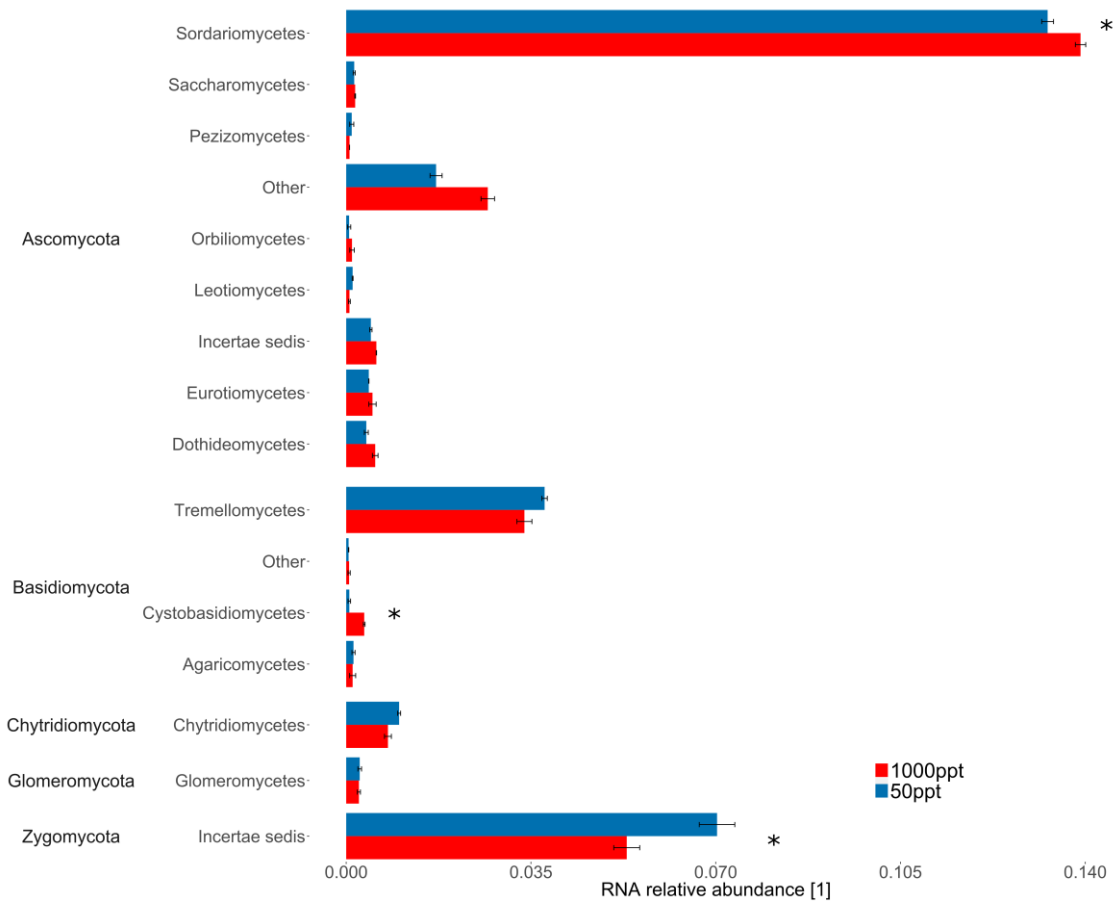

**Figure 4** Taxonomic composition of the mid-latitude corn field soil Mainz, Germany, at 22% WFPS<sub>lab</sub> of the samples under 1000 ppt or 50 ppt OCS. RNA relative abundance of internal transcribed spacer (ITS) for fungal classes have been normalized by the total number of assigned reads per sample. Classes with RNA relative abundance  $< 5 \times 10^{-4}$  did not show significant differences and were not plotted. Error bars represent standard deviation. Asterisks represent statistically different values ( $p$ -value  $< 0.05$ ). “Other” is identified by the Qiime pipeline, however with no known classification in the database, under the used threshold of sequence similarity (90%).

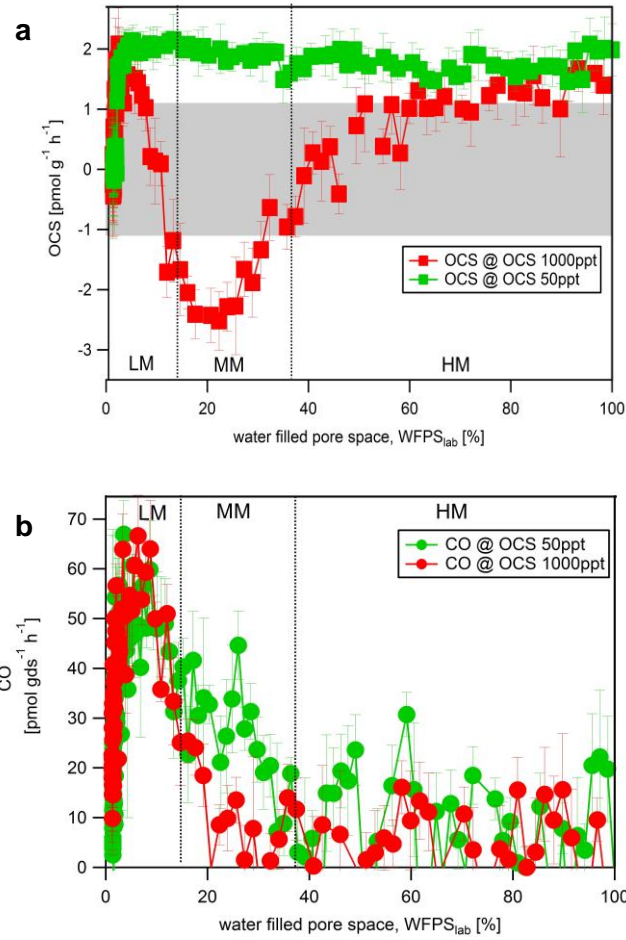

**Fig. 4** OCS exchange rates (a) and CO exchange rates (b) at OCS mixing ratio of 50 ppt (green) and 1000 ppt (red) are shown for the A1 soil sample from a mid latitude corn field, Mainz, Germany, data for (a) adapted from Bunk et al., submitted. Grey shaded area represents threshold  $1.09$  to  $-1.09 \text{ pmol g}^{-1} \text{h}^{-1}$  where no significant OCS exchange could be detected. LM, MM and HM indicate low, medium and high moisture levels, respectively.

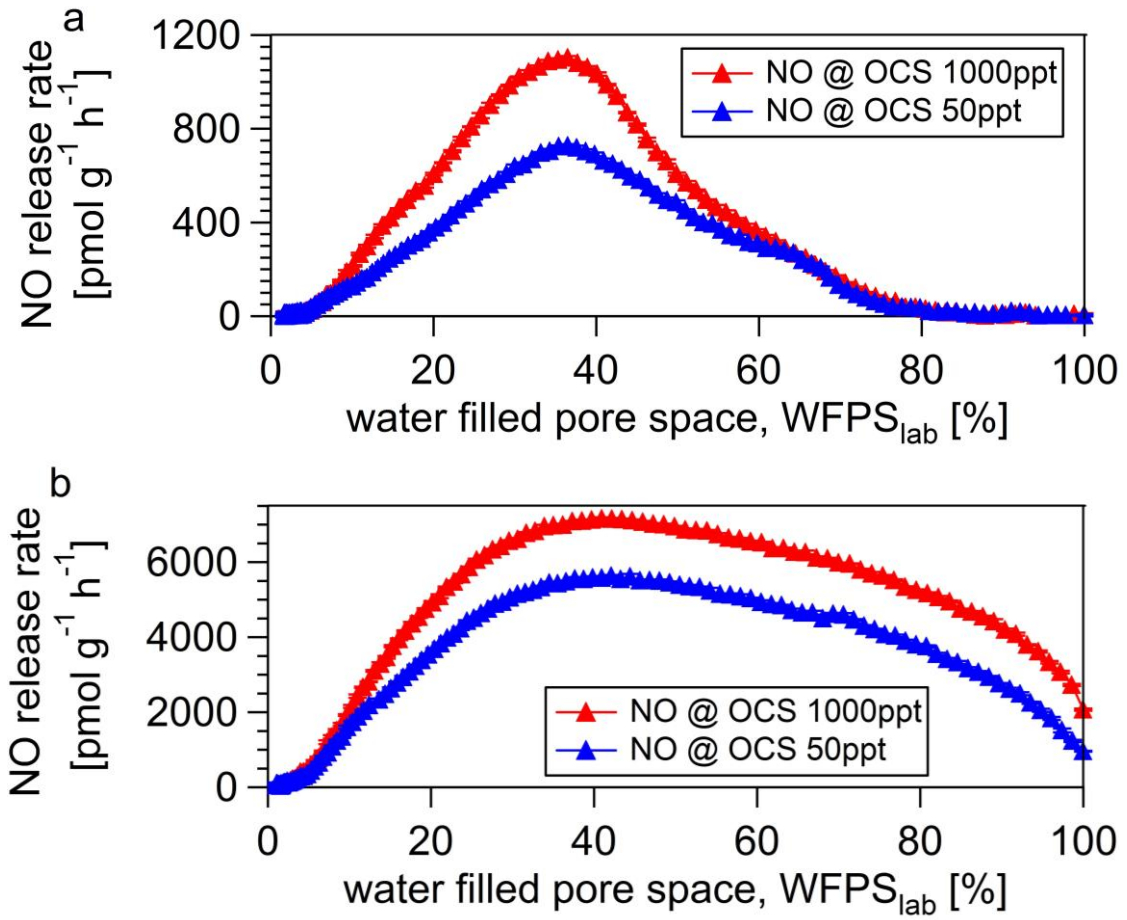

**Figure 5** NO exchange rates (a) are shown for a mid-latitude cornfield soil sample 40°C dried from Mainz, Germany (A1) and a soil sample originated from a spruce forest Sparneck, Germany at OCS mixing ratio of 50 ppt (blue) and 1000 ppt (red).



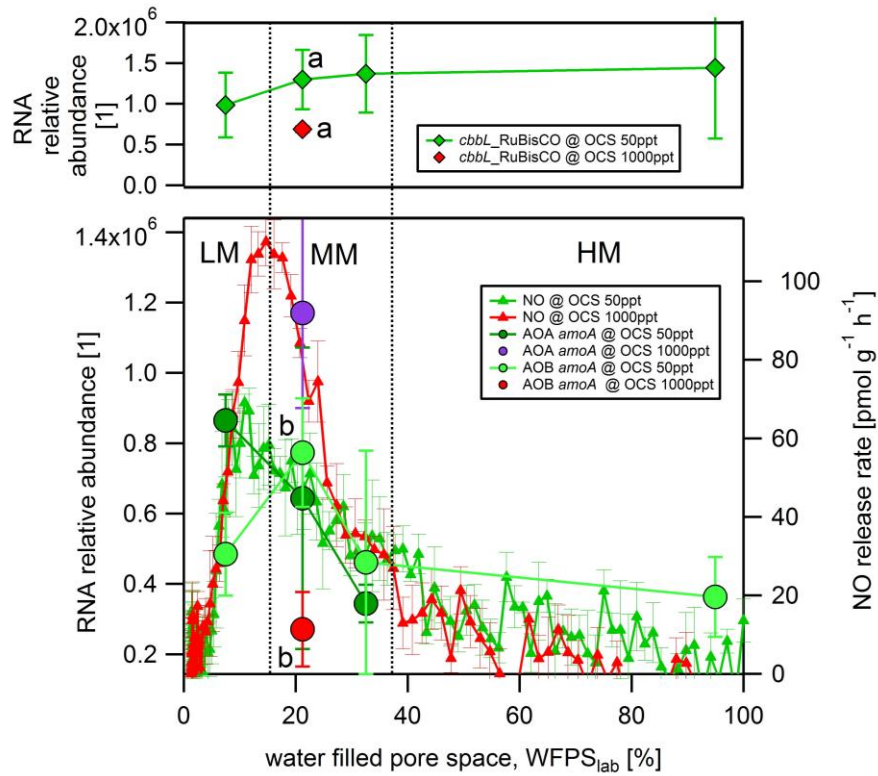

**Fig. 5** RNA relative abundance of *cbbL* functional gene, encoding Ribulose 1,5 Bisphosphate Carboxylase (RuBisCO) large subunit type IA, measured over dry out under 50 ppt OCS (green diamonds) and 1000 ppt OCS (red diamond). RNA relative abundance of *amoA* functional gene for ammonia oxidizing bacteria (AOB, bright green points) and ammonia oxidizing archaea (AOA, dark green points) measured over dry out under 50 ppt OCS and 1000 ppt OCS (AOB, orange point and AOA light green point). NO exchange rates at 50 ppt (dark blue) and 1000 ppt (light blue) OCS mixing ratio are shown for the A1 soil sample from a mid-latitude corn field, Mainz, Germany. Note values for *amoA* AOB are multiplied by 100 and differences in RNA relative abundance under 50 ppt and 1000 ppt are statistically significant ( $p$  value < 0.05, a, b).

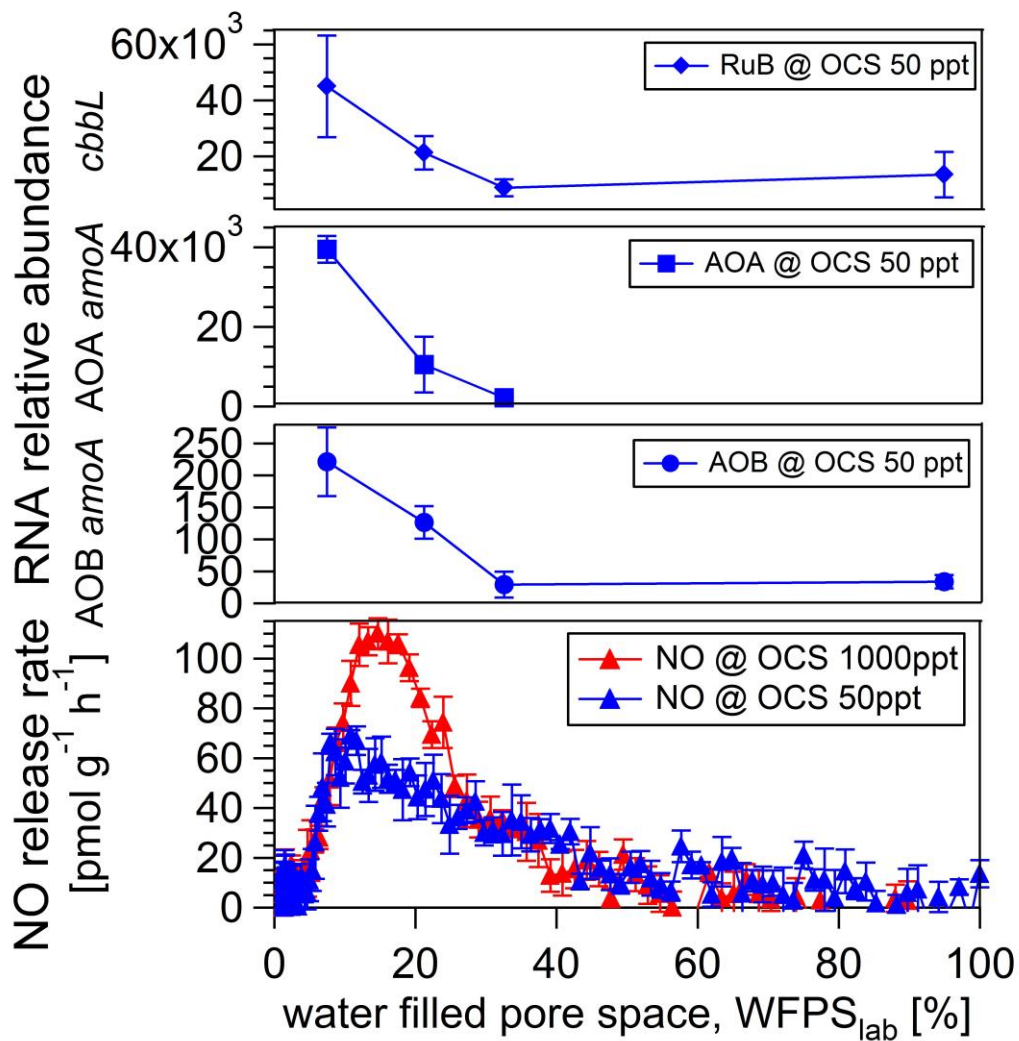

**Figure 6** RNA relative abundance of *cbbL* functional gene, encoding Ribulose-1,5-Bisphosphate-Carboxylase (RubisCO) large subunit type IA, measured over dry-out under 50 ppt OCS (blue diamonds). RNA relative abundance of *amoA* functional gene for ammonia oxidizing archaea (AOA, blue squares) and ammonia oxidizing bacteria (AOB, blue points) measured over dry-out under 50 ppt OCS. NO exchange rates at 50 ppt (dark blue) and 1000 ppt (light blue) OCS mixing ratio are shown for the A1 soil sample from a mid-latitude corn field, Mainz, Germany.

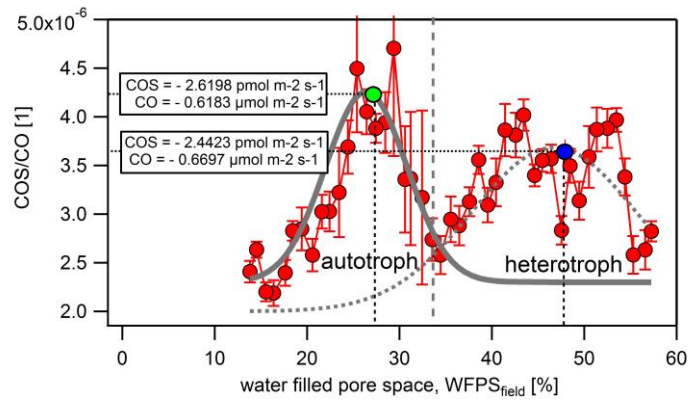

**Fig. 6** OCS:CO ratio reanalyzed from chamber measurements from Sun et al. (2017) field data in a Scots pine forest from Hyytiälä normalized by assuming  $Q_{10}$  value equals 2. Just as denitrification and nitrification affect  $N_2O:NO$  ratios differently, we assume 2 different processes (one autotrophic and one heterotrophic) were simultaneously involved in OCS exchange and CO consumption, one dominating under elevated and the other under moderate soil moisture (indicated as grey optimum functions).

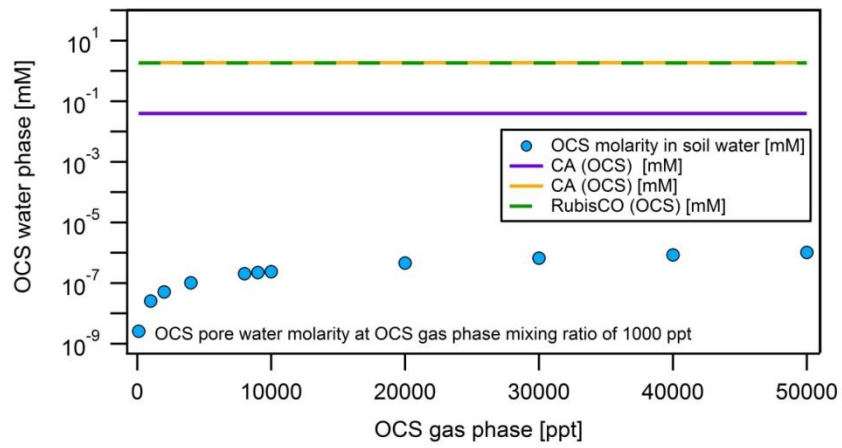

**Fig. 7** The range of  $K_M$  values of carbonic anhydrase (purple and orange) and RubisCO (green) compared to the calculated OCS concentration in the water phase (blue). The expected water phase concentration was calculated in a similar approach than in Bunk et al. (2017) from the known gas phase concentration following Henry's law. The  $K_M$  values are medians of data reported in the BRENDA database (see section 4.4).
